# Supplementary material for: Fam20c regulates the calpain proteolysis system through phosphorylating Calpasatatin to maintain cell homeostasis
Source: J Transl Med. 2023 Jun 27;21:417. doi: 10.1186/s12967-023-04275-4 (PMC10294482; doi:10.1186/s12967-023-04275-4)
Supplement: Supplementary file 10 — Additional file 10. Table S4 127 overlapped up-regulated differentially expressed genes between ATAC-seq and RNA-seq. [file 12967_2023_4275_MOESM10_ESM.xlsx]

Table. S3 Gene expression and Q value of RNA-seq.
Gene ID	Gene Symbol	Type	log2 (KO / OB)	Qvalue ( (KO / OB))
66588	Cmpk1	mRNA	-0.213139602	0.019535844
70894	Efcab3	mRNA	1.896277906	0.013556519
74185	Gbe1	mRNA	0.505962757	1.79E-04
69700	Col22a1	mRNA	4.86162854	0.002238534
269529	Fbxo10	mRNA	0.829165774	1.32E-18
18710	Pik3r3	mRNA	0.305698647	0.001761577
12054	Bcl7b	mRNA	-0.316671214	0.00673899
100434	Slc44a1	mRNA	-0.242085582	0.005585915
29820	Tnfrsf19	mRNA	0.770382559	2.22E-05
68861	1190002N15Rik	mRNA	0.251850655	0.019400252
209416	Gpkow	mRNA	0.198047684	0.010523146
239833	Lmln	mRNA	-0.984053606	1.10E-12
18133	Nov	mRNA	-0.53691058	1.31E-06
26922	Mecr	mRNA	-0.632160124	1.58E-07
276829	Smtnl2	mRNA	1.30848598	3.41E-04
13209	Ddx6	mRNA	0.350268991	1.24E-06
17122	Mxd4	mRNA	0.4298088	2.48E-04
56358	Copz2	mRNA	0.293832635	0.004825353
28109	D10Wsu102e	mRNA	-0.33415808	4.52E-05
240427	Setbp1	mRNA	0.237381074	0.027420193
245666	Iqsec2	mRNA	0.262612232	0.017147063
18803	Plcg1	mRNA	0.181862623	0.011562026
11820	App	mRNA	-0.359905872	7.45E-13
50784	Plpp2	mRNA	-0.224307932	0.020680825
12465	Cct5	mRNA	-0.223265732	1.53E-05
14137	Fdft1	mRNA	-0.316198697	6.59E-07
19012	Plpp1	mRNA	-0.298717491	3.05E-04
11804	Aplp2	mRNA	0.168618425	0.001221412
208198	Btbd2	mRNA	0.263692875	0.001587215
66308	Mplkip	mRNA	-0.337224934	0.010325946
16889	Lipa	mRNA	0.337391238	3.08E-06
78929	Polr3h	mRNA	-0.425786719	2.16E-08
14402	Gabrb3	mRNA	4.957542777	2.52E-24
80886	Senp3	mRNA	-0.253159609	3.73E-04
67974	Ccny	mRNA	-0.307604053	4.54E-06
241633	Atp8b4	mRNA	-1.914737422	0.034015918
66854	Trim35	mRNA	0.250766441	7.98E-05
15547	Trmt2a	mRNA	-0.478181182	3.26E-11
17112	Tm4sf1	mRNA	-0.262065313	0.001797326
56320	Dbn1	mRNA	-0.47731646	8.14E-16
70144	Lrch3	mRNA	-0.862696286	9.76E-27
225363	Etf1	mRNA	-0.55849701	1.12E-26
211323	Nrg1	mRNA	-0.267989096	0.001059521
107566	Arl2bp	mRNA	-0.369238659	1.07E-06
380912	Zfp395	mRNA	0.343955576	7.54E-04
21778	Tex9	mRNA	0.360997488	2.36E-04
17436	Me1	mRNA	-0.438917081	2.04E-18
110196	Fdps	mRNA	-0.67729764	7.27E-29
320712	Abi3bp	mRNA	-2.05659301	2.82E-16
494448	Cbx6	mRNA	0.122517164	0.025827189
67544	Fam120b	mRNA	0.241109768	0.011400275
100042165	BC005561	mRNA	0.366652459	0.003284188
21749	Terf1	mRNA	-0.333176437	0.001261622
71778	Klhl5	mRNA	-0.310424494	4.51E-05
20200	S100a6	mRNA	0.429674941	4.55E-07
100121	Tdrd7	mRNA	0.365063309	0.001648398
53380	Psmd10	mRNA	-0.308006926	0.002746034
67059	Ola1	mRNA	-0.20961446	0.003574742
15490	Hsd17b7	mRNA	-0.266704935	0.008754798
14950	H13	mRNA	0.511759327	1.01E-18
270198	Pfkfb4	mRNA	-0.426383479	0.003571453
57354	Cramp1l	mRNA	0.234396134	0.039997775
319165	Hist1h2ad	mRNA	-0.60362294	5.79E-04
26444	Psma7	mRNA	-0.24268238	0.004372015
71954	Suds3	mRNA	-0.229804899	0.00187177
208715	Hmgcs1	mRNA	-0.668381211	1.69E-38
68092	Ncbp2	mRNA	-1.106880979	5.42E-80
20318	Sdf4	mRNA	-0.254278902	1.69E-04
79555	BC005537	mRNA	-0.200479512	0.007025302
16832	Ldhb	mRNA	-5.404569718	2.55E-20
22146	Tuba1c	mRNA	-0.246203431	2.21E-05
70461	Crtc3	mRNA	0.274670325	0.001379958
68166	Spire1	mRNA	-0.914853131	5.47E-36
68298	Ncapd2	mRNA	-0.16134779	0.005205953
56726	Sh3bgrl	mRNA	0.280897233	3.59E-08
11496	Adam22	mRNA	1.464118956	1.11E-40
72469	Plcd3	mRNA	0.230458869	0.016625015
234967	Slc36a4	mRNA	0.275928667	0.001443468
21854	Timm17a	mRNA	-0.250571259	0.010627758
19646	Rbbp4	mRNA	-0.355103369	2.30E-12
209737	Kif15	mRNA	-0.198964033	0.022377043
68626	Elac2	mRNA	-0.276684094	9.68E-04
18194	Nsdhl	mRNA	-0.441359749	2.32E-11
245877	Map7d1	mRNA	-0.533374163	2.87E-19
71602	Myo1e	mRNA	0.307070237	4.98E-07
72461	Prcp	mRNA	0.375404154	2.80E-04
57783	Tnip1	mRNA	-0.221437581	0.008324385
66191	Ier3ip1	mRNA	-0.530027697	7.07E-07
268294	Zbtb24	mRNA	0.2916096	0.038638998
108167614	Gm46084	mRNA	0.749280947	0.037427084
11750	Anxa7	mRNA	-0.258814641	5.80E-04
105727	Slc38a1	mRNA	0.88364473	7.65E-17
11522	Adh1	mRNA	1.64418029	0.012825947
80904	Dtx3	mRNA	0.345731367	9.61E-05
72640	Mex3a	mRNA	0.384239421	8.32E-09
56784	Ralgapa1	mRNA	0.398657746	7.68E-05
104175	Sbk1	mRNA	0.492693626	0.039154924
16828	Ldha	mRNA	-0.377936095	6.31E-11
12235	Bub1	mRNA	-0.319648159	5.82E-06
14815	Nr3c1	mRNA	-0.183591448	0.006348342
75062	Sf3a3	mRNA	-0.583355061	6.62E-15
98415	Nucks1	mRNA	-0.228451446	1.29E-04
19361	Rad51	mRNA	-0.352310033	6.38E-05
108167568	Gm46063	pseudo	6.075652578	6.07E-05
231070	Insig1	mRNA	-0.901494386	2.45E-68
11475	Acta2	mRNA	-2.673423271	2.54E-290
244144	Usp35	mRNA	0.391310542	0.017812434
67096	Mmachc	mRNA	-1.064653353	3.13E-13
210530	P3h2	mRNA	-1.096174598	1.15E-26
319535	Zfp182	mRNA	0.561296648	1.05E-06
67268	Myl12a	mRNA	-0.200878601	0.002072562
108900	Fam72a	mRNA	-0.705653253	0.012188879
24017	Rnf13	mRNA	0.22222036	0.001924059
240892	Dusp27	mRNA	3.436843639	2.24E-06
105670	Rcbtb2	mRNA	0.355416749	1.26E-04
103534	Mgat4b	mRNA	-0.251774508	1.19E-04
68691	Kansl1l	mRNA	0.578629075	1.00E-09
105243585	Gm39469	mRNA	0.627408902	1.56E-05
20005	Rpl9	mRNA	-0.143884213	0.04585239
13660	Ehd1	mRNA	-0.352393633	5.76E-09
224630	Bnip1	mRNA	-0.517861858	0.006066307
112422	Zfp979	mRNA	0.571366002	0.004443317
230119	Zbtb5	mRNA	0.835447155	1.51E-18
71846	Syce2	mRNA	0.774768532	8.23E-04
67573	Loxl4	mRNA	-0.293234698	3.82E-06
210356	Nckap5	mRNA	0.417883498	0.041556993
56459	Sae1	mRNA	-0.240322695	2.17E-04
29861	Dpf1	mRNA	-0.417896088	0.031880531
18129	Notch2	mRNA	0.297551582	3.71E-04
15422	Hoxc13	mRNA	-0.51455964	5.42E-04
213211	Rnf26	mRNA	-0.333029975	3.50E-05
242362	Manea	mRNA	0.842782112	3.29E-24
320709	Tmem117	mRNA	1.285482198	2.09E-24
328949	Mcc	mRNA	-0.340721722	5.18E-04
218952	Fermt2	mRNA	-0.208549653	0.002897274
18813	Pa2g4	mRNA	-0.348787192	1.67E-08
226255	Atrnl1	mRNA	0.320572482	1.42E-04
83945	Dnaja3	mRNA	-0.255971383	7.68E-04
56451	Suclg1	mRNA	-0.305622794	4.12E-05
236727	Slc9a7	mRNA	1.061901011	1.93E-08
18641	Pfkl	mRNA	0.294137762	4.08E-05
78733	Troap	mRNA	-0.160729882	0.02715162
73137	Prrc1	mRNA	-0.194111673	0.019212949
14231	Fkbp7	mRNA	0.882418896	2.78E-21
80898	Erap1	mRNA	0.244234498	1.51E-04
68920	1110065P20Rik	mRNA	-0.747451007	4.45E-04
245522	Zc4h2	mRNA	0.232410649	0.039974626
106582	Nrm	mRNA	0.255346785	0.047662233
50523	Lats2	mRNA	-0.372485902	3.08E-05
68917	Hint2	mRNA	0.676130031	0.001582667
108156	Mthfd1	mRNA	-0.389870322	7.75E-08
73422	Prox2	mRNA	0.624600915	0.018142375
100129	Gpr153	mRNA	1.250739976	2.38E-20
67846	Tmem39a	mRNA	-0.598125625	8.01E-18
280668	Adam1a	mRNA	0.937361162	0.011891162
109331	Rnf20	mRNA	-0.298054216	5.58E-05
18196	Nsg1	mRNA	0.218428641	1.20E-04
13982	Esr1	mRNA	5.573736914	5.97E-04
74103	Nebl	mRNA	1.577129019	4.20E-16
72672	Zfp518a	mRNA	0.334090699	0.001276035
53313	Atp2a3	mRNA	0.679554583	0.002101646
14571	Gpd2	mRNA	-0.217182876	0.013197362
11798	Xiap	mRNA	0.226905037	0.005272476
110147	Ehmt2	mRNA	-0.153901903	0.022165925
26443	Psma6	mRNA	-0.207454787	0.004707224
66469	Fam213b	mRNA	-2.679492463	1.65E-04
209462	Hace1	mRNA	0.355483845	0.002285375
70354	Secisbp2l	mRNA	-0.190390737	0.01042354
14425	Galnt3	mRNA	0.753117111	0.001591522
11910	Atf3	mRNA	0.560853334	2.15E-07
240263	Fem1c	mRNA	-0.259093439	0.023326491
333789	N4bp2	mRNA	0.580060072	1.07E-09
60455	Rxylt1	mRNA	0.363151507	0.007081903
21848	Trim24	mRNA	0.472212916	2.04E-11
56150	Mad2l1	mRNA	-0.271926804	8.31E-06
218121	Mboat1	mRNA	-0.671435671	1.05E-05
67770	Caap1	mRNA	-0.493816572	1.76E-04
30948	Bin1	mRNA	-0.993518348	5.89E-35
18018	Nfatc1	mRNA	-0.362429587	1.21E-04
13400	Dmpk	mRNA	0.32528936	0.008667951
70178	Abhd17c	mRNA	-0.514290092	1.23E-10
14790	Grcc10	mRNA	0.251837008	0.046772315
77809	Lrrc42	mRNA	-0.451137418	4.65E-07
217995	Heatr1	mRNA	-0.572982246	1.89E-13
66536	Nipsnap3b	mRNA	-0.4025512	0.002529552
66704	Rbm4b	mRNA	0.339918547	0.005570341
72119	Tpx2	mRNA	-0.269538653	2.28E-07
103554	Psme4	mRNA	0.221210977	5.52E-04
58802	Kcnmb4	mRNA	0.853400996	0.009218098
17196	Mbp	mRNA	-2.031564928	2.73E-06
230789	Fam76a	mRNA	-0.429191244	4.67E-06
12237	Bub3	mRNA	-0.213906643	8.67E-04
99334	Zscan29	mRNA	0.471722972	8.75E-07
216343	Tph2	mRNA	2.452085526	2.91E-05
22367	Vrk1	mRNA	-0.268225154	0.015872159
320213	Senp5	mRNA	-1.265396007	1.21E-103
76740	Efr3a	mRNA	0.204568154	4.20E-04
64113	Moap1	mRNA	0.699509381	0.047176291
213948	Atg9b	mRNA	1.414529051	5.37E-27
99011	Pomt1	mRNA	0.34576592	0.018411093
52530	Nhp2	mRNA	-0.549010869	6.29E-11
228140	Tnks1bp1	mRNA	0.158737329	0.016945793
94275	Maged1	mRNA	0.546009647	1.53E-35
66839	Dele1	mRNA	-0.416606037	1.16E-05
66977	Nuf2	mRNA	-0.287707459	2.27E-05
216767	Mrpl22	mRNA	-0.308912491	0.00889649
68212	Tmbim4	mRNA	0.551459381	7.80E-08
15525	Hspa4	mRNA	-0.252042787	4.50E-07
51799	Rundc3a	mRNA	0.973252926	3.91E-11
210146	Irgq	mRNA	0.50736109	5.73E-07
328417	Parp4	mRNA	0.261727067	0.017836495
207214	Larp4	mRNA	-0.161117401	0.019811395
245880	Wasf3	mRNA	2.051262021	9.42E-34
320873	Cdh10	mRNA	3.241049729	2.49E-07
240913	Adamts4	mRNA	1.154470709	4.06E-56
76074	Gbp8	mRNA	2.075594094	7.84E-09
235184	Msantd2	mRNA	0.367836669	8.93E-05
12745	Clgn	mRNA	-1.557678925	0.007151344
242939	Cpz	mRNA	-2.404168083	0.024326362
78903	Wrnip1	mRNA	-0.409860073	9.85E-05
235439	Herc1	mRNA	0.390495247	9.03E-05
78808	Stxbp5	mRNA	0.523530232	1.48E-12
12631	Cfl1	mRNA	-0.205730994	5.01E-04
67602	Necap1	mRNA	-0.250595288	0.001733913
17219	Mcm6	mRNA	0.165745391	0.001760596
223723	Ttll12	mRNA	-0.385632136	1.92E-11
68126	Fahd2a	mRNA	0.76048977	0.013139805
13002	Dnajc5	mRNA	0.139545855	0.04469618
16010	Igfbp4	mRNA	0.434469716	1.91E-04
99899	Ifi44	mRNA	0.297725369	0.00233978
230233	Elp1	mRNA	-0.530913624	1.86E-12
76217	Jakmip2	mRNA	0.718712347	1.12E-06
71720	Osbpl3	mRNA	0.206673655	0.033386645
99031	Osbpl6	mRNA	0.636244856	1.94E-06
20358	Sema6a	mRNA	1.721331853	0.003328287
235043	Tmem205	mRNA	0.534373821	0.014647598
56811	Dkk2	mRNA	2.428815436	0.007790537
230857	Ece1	mRNA	-0.37191553	4.17E-06
381812	Cracr2a	mRNA	-1.241782136	0.033905153
380686	Cnrip1	mRNA	-0.766354461	5.00E-04
56305	Pitpnb	mRNA	-0.193661401	4.92E-04
628308	Zfp970	mRNA	0.427214592	1.59E-10
70355	Gprc5c	mRNA	1.538885107	0.041121171
71745	Cul2	mRNA	-0.197676423	0.021272307
58208	Bcl11b	mRNA	1.335918824	3.60E-09
98365	Slamf9	mRNA	2.272259159	0.010721773
93709	Pcdhga1	mRNA	1.069819322	2.42E-07
108660	Rnf187	mRNA	-0.226536481	5.93E-04
22059	Trp53	mRNA	-0.375005389	1.03E-09
99982	Kdm1a	mRNA	-0.418780452	2.84E-09
64144	Mllt1	mRNA	-0.246728599	2.10E-04
14050	Eya3	mRNA	-0.269794294	0.006276731
241490	Rbm45	mRNA	-0.221839696	0.037467781
74150	Slc35f5	mRNA	0.278463646	8.36E-04
233328	Lrrk1	mRNA	0.276533742	5.40E-05
269037	Ctif	mRNA	-0.404915802	1.80E-04
11857	Arhgdib	mRNA	0.298148541	0.042304937
20742	Sptbn1	mRNA	-0.172472105	0.020854264
12286	Cacna1a	mRNA	-0.25432116	0.012047354
68036	Zfp706	mRNA	0.153954445	0.003541232
27279	Tnfrsf12a	mRNA	-0.434870223	2.23E-09
50771	Atp9b	mRNA	-0.390454232	8.57E-06
13605	Ect2	mRNA	-0.169538838	0.022860661
67674	Trmt112	mRNA	-0.328995302	9.34E-04
12362	Casp1	mRNA	0.427132101	2.08E-06
245174	Zfp937	mRNA	0.525608806	2.92E-06
56089	Ramp3	mRNA	-1.632961519	6.27E-06
67993	Nudt12	mRNA	1.124772986	1.96E-07
94062	Mrpl3	mRNA	-0.187770516	0.014075092
67815	Sec14l2	mRNA	0.574390052	9.12E-04
56306	Sinhcaf	mRNA	-0.275501712	0.004408449
619441	Tnfsfm13	mRNA	0.830347956	4.13E-04
140500	Acap3	mRNA	-0.366222997	5.30E-04
230734	Yrdc	mRNA	-0.975787454	1.45E-18
14793	Cdca3	mRNA	-0.276780404	2.90E-04
67239	Rpf2	mRNA	-0.300046797	0.001086518
22642	Zbtb17	mRNA	-0.383620445	0.001673388
18798	Plcb4	mRNA	-0.691865046	7.57E-10
11777	Ap3s1	mRNA	-0.522788628	6.27E-11
26905	Eif2s3x	mRNA	-0.140489826	0.013057511
72097	2010300C02Rik	mRNA	2.612193472	1.91E-06
212307	Mapre2	mRNA	-0.509235247	1.56E-12
23825	Banf1	mRNA	-0.261905909	0.001806805
225358	Fam13b	mRNA	-0.239950014	0.001726456
100463512	Gm20594	mRNA	-0.600339152	4.27E-09
16186	Il2rg	mRNA	-0.583745835	3.40E-06
54353	Skap2	mRNA	0.511391818	5.91E-12
11931	Atp1b1	mRNA	-1.469409297	4.63E-86
105722	Ano6	mRNA	0.249763	4.70E-06
229541	Dennd4b	mRNA	0.65194815	0.023006065
19225	Ptgs2	mRNA	-0.658306539	4.70E-14
14705	Bscl2	mRNA	0.400988199	0.018077957
207932	Urb1	mRNA	-0.371428974	0.001616178
208884	Zdhhc9	mRNA	-0.294262421	4.74E-04
66286	Sec11c	mRNA	-0.406551261	0.013083814
16151	Ikbkg	mRNA	-0.340859687	4.61E-06
77505	Dnhd1	mRNA	1.07807343	6.49E-17
170753	Zfp704	mRNA	0.347076838	1.96E-04
74451	Pgs1	mRNA	-0.366265976	5.71E-06
76938	Rbm17	mRNA	-0.157449594	0.048616503
93710	Pcdhga2	mRNA	0.908389118	0.010208133
353310	Zfp703	mRNA	0.952589741	1.07E-48
93686	Rbfox2	mRNA	0.394113005	2.70E-11
20392	Sgce	mRNA	0.44285048	3.03E-07
21822	Tgtp1	mRNA	-0.651141198	0.006032045
24051	Sgcb	mRNA	0.37267375	1.29E-04
72322	Xpo5	mRNA	-0.272122961	2.00E-04
97820	4833439L19Rik	mRNA	-0.290920955	9.42E-05
109212	Pimreg	mRNA	-0.567650048	4.90E-12
67125	Tspan31	mRNA	0.326998068	5.20E-08
213819	Casd1	mRNA	0.392385125	1.03E-04
17865	Mybl2	mRNA	-0.489618819	1.53E-08
19159	Cyth3	mRNA	-0.173650761	0.016480775
230126	Shb	mRNA	0.482604938	7.19E-06
68743	Anln	mRNA	-0.346450186	2.30E-10
26385	Grk6	mRNA	-0.567554227	4.26E-18
244654	Mtss1l	mRNA	0.554888379	6.22E-11
66492	Zmat2	mRNA	-0.239205031	0.006436784
68545	Ecscr	mRNA	-0.537451644	3.80E-07
108167344	Gm45951	mRNA	0.454022174	1.68E-04
108147	Atic	mRNA	-0.49486888	9.02E-18
72055	Slc38a10	mRNA	0.213997329	3.16E-04
19662	Rbp4	mRNA	-2.870070993	5.67E-08
23829	C1ql1	mRNA	-0.513977528	1.21E-04
74954	4930503E14Rik	mRNA	1.140985591	0.006402699
68059	Tm9sf2	mRNA	0.220087055	5.10E-04
14857	Gsta1	mRNA	-3.876842823	1.17E-05
67226	Tmem19	mRNA	0.223547387	0.030977044
14630	Gclm	mRNA	-0.497330952	8.51E-08
108167482	Gm46011	mRNA	-1.319999602	0.019477145
69823	Fyttd1	mRNA	-1.400089684	5.30E-143
17954	Nap1l2	mRNA	1.679617967	9.18E-11
223776	Selenoo	mRNA	-0.296456204	0.008355953
71722	Cic	mRNA	0.167257402	0.04018195
94067	Mrpl43	mRNA	-0.224402473	0.029790398
338371	Endov	mRNA	0.452493612	3.61E-05
74140	Tm9sf1	mRNA	0.206189314	0.039206638
71947	Tmem94	mRNA	0.27793193	0.001791578
114249	Npnt	mRNA	0.660947577	5.48E-06
16452	Jak2	mRNA	0.238697694	3.63E-04
72947	Phykpl	mRNA	-0.36527906	0.003475786
17930	Myom2	mRNA	2.447120619	2.44E-16
53885	Nphp1	mRNA	0.200561511	0.026760881
67150	Rnf141	mRNA	-0.230038588	0.011315985
18938	Ppp1r14b	mRNA	-0.421064101	0.046442684
19087	Prkar2a	mRNA	-0.309726408	8.28E-05
225160	Thoc1	mRNA	-0.484335991	4.06E-10
17873	Gadd45b	mRNA	0.269367365	8.63E-04
100043188	Gm10696	mRNA	-2.140188637	0.046805992
22341	Vegfc	mRNA	-0.406781789	0.039075903
22685	Zfp239	mRNA	-0.534813247	0.012695697
15408	Hoxb13	mRNA	0.510921654	0.032378417
15366	Hmmr	mRNA	-0.292647494	1.27E-05
11769	Ap1s1	mRNA	-0.138861058	0.044283433
11740	Slc25a5	mRNA	-0.284197163	9.14E-08
57785	Rangrf	mRNA	-0.56199586	4.66E-05
67154	Mtdh	mRNA	0.178321765	3.40E-04
227693	Zer1	mRNA	0.277708372	0.015548522
12836	Col7a1	mRNA	-0.270913971	0.049945422
78921	9130019O22Rik	mRNA	-1.597457665	9.69E-06
109700	Itga1	mRNA	0.772085092	0.035816281
319370	Ubald2	mRNA	-0.377920124	0.001038424
72656	Ints8	mRNA	0.364451328	3.51E-07
56349	Net1	mRNA	-0.468177492	2.72E-07
19260	Ptpn22	mRNA	0.570632485	0.011795831
50766	Crim1	mRNA	-0.578307959	7.68E-19
30957	Mapk8ip3	mRNA	0.507370022	4.33E-09
14469	Gbp2	mRNA	0.407828073	2.48E-10
16978	Lrrfip1	mRNA	-0.324082627	5.45E-07
243771	Parp12	mRNA	0.39086374	9.97E-09
18563	Pcx	mRNA	-0.871292584	5.39E-20
56309	Mycbp	mRNA	-0.347034023	0.019603238
108168152	Gm8126	mRNA	0.93651563	7.23E-07
12727	Clcn4	mRNA	0.477632622	6.87E-11
51796	Srrm1	mRNA	-0.302378267	1.09E-06
18145	Npc1	mRNA	-0.388747616	4.62E-06
671878	Sms-ps	pseudo	-0.472130709	2.13E-05
22418	Wnt5a	mRNA	0.369745274	0.004671464
545389	Cep170	mRNA	0.510645349	1.52E-11
27416	Abcc5	mRNA	-1.118644894	3.30E-57
74116	Pi16	mRNA	2.383844529	4.33E-09
15370	Nr4a1	mRNA	-0.526879535	0.002667216
69893	Coa7	mRNA	-0.459258307	0.002782997
19655	Rbmx	mRNA	-0.248118278	3.21E-04
404710	Iqgap3	mRNA	-0.283783533	9.59E-05
102442	Dennd4a	mRNA	0.182406849	0.010880746
52710	Slc52a2	mRNA	0.322121816	0.013198613
69550	Bst2	mRNA	-0.408610583	1.24E-04
16876	Lhx9	mRNA	1.395528215	0.002492699
11481	Acvr2b	mRNA	0.950088915	0.001975103
29856	Smtn	mRNA	-0.391325236	3.99E-07
77569	Limch1	mRNA	-0.691725633	3.07E-05
66569	Gdpd1	mRNA	0.804727686	3.69E-16
18764	Pkd2	mRNA	0.383744247	7.39E-08
209318	Gps1	mRNA	-0.239633089	7.43E-05
71834	Zbtb43	mRNA	0.270140804	0.028795186
13043	Cttn	mRNA	0.168752871	0.002196977
12468	Cct7	mRNA	-0.307451407	8.03E-10
67416	Armcx2	mRNA	0.281812492	3.47E-06
72154	Zfp157	mRNA	0.315470632	0.010599921
66925	Sdhd	mRNA	-0.25638625	4.12E-04
18162	Npr3	mRNA	-3.214021409	0
78246	Phf23	mRNA	-0.494164854	5.59E-10
66249	Pno1	mRNA	-0.468296194	3.82E-12
217365	Nploc4	mRNA	-0.228039755	1.21E-04
71738	Mamdc2	mRNA	1.265980039	1.15E-07
93703	Pcdhgb6	mRNA	-1.590272954	2.42E-28
67623	Tm7sf3	mRNA	0.204549223	0.017136648
209334	Gen1	mRNA	-0.332305966	0.016824747
67299	Dock7	mRNA	-0.332712301	1.67E-05
18214	Ddr2	mRNA	0.289109804	2.68E-06
110460	Acat2	mRNA	-0.514398218	2.91E-14
66306	Fam53c	mRNA	-0.281383626	0.004283479
230125	Slc25a51	mRNA	0.524425102	1.57E-15
72895	Setd5	mRNA	0.205289759	0.00723874
12558	Cdh2	mRNA	-0.250690135	6.67E-05
67468	Mmd	mRNA	-0.374233265	2.41E-04
19258	Ptpn4	mRNA	0.286989897	0.002136847
77794	Adamtsl2	mRNA	3.841200742	1.46E-09
17128	Smad4	mRNA	-0.42316234	2.74E-10
100502698	Rubcn	mRNA	-0.874106731	4.60E-50
13607	Eda	mRNA	1.386198064	1.16E-05
66928	Dmac1	mRNA	-0.448475882	0.00952816
13544	Dvl3	mRNA	-0.962270039	7.24E-53
227102	Ormdl1	mRNA	0.282535816	0.030825034
78248	Armcx1	mRNA	0.668181894	2.36E-04
59046	Arpp19	mRNA	0.197512422	0.002087043
57905	Isy1	mRNA	-0.456428181	2.36E-06
66510	Rnf181	mRNA	-0.26690706	4.60E-04
12623	Ces1g	mRNA	-0.731817487	0.008762463
14544	Gda	mRNA	-1.523189309	4.93E-04
17085	Ly9	mRNA	0.747491651	7.78E-06
72836	Pot1b	mRNA	0.357889245	0.02770247
53374	Chst3	mRNA	0.887986888	1.34E-05
93765	Ube2n	mRNA	0.182417905	0.003476113
12870	Cp	mRNA	0.63654958	7.74E-10
226841	Vash2	mRNA	0.452703495	1.23E-10
68195	Rnaset2b	mRNA	0.354105431	3.59E-04
73569	Vgll3	mRNA	-0.512479211	4.30E-13
67014	Riox2	mRNA	-0.892021557	6.67E-17
24117	Wif1	mRNA	4.558569085	1.13E-50
106628	Trip10	mRNA	-0.461238851	7.12E-08
20346	Sema3a	mRNA	-0.837017898	4.49E-10
100503670	Rpl5	mRNA	-0.201085806	0.001955774
225594	Gm4841	mRNA	1.237775763	7.25E-08
104086	Cyp27a1	mRNA	2.362851056	1.72E-15
73047	Camk2n2	mRNA	-0.777336271	2.09E-05
404634	H2afy2	mRNA	-0.734471617	3.81E-10
59056	Evc	mRNA	0.500594665	2.20E-17
229731	Slc25a24	mRNA	-0.159187276	0.009480483
18709	Pik3r2	mRNA	0.39288205	8.40E-09
66158	Rtl8a	mRNA	0.19429507	0.045153835
210126	Lpp	mRNA	-0.940896178	9.91E-30
67808	Tprgl	mRNA	-0.563515154	6.12E-09
19367	Rad9a	mRNA	-0.372375703	5.02E-04
56453	Mbtps1	mRNA	0.166219076	0.015253963
68549	Sgo2a	mRNA	-0.256467715	0.001732472
15568	Elavl1	mRNA	-0.288383206	2.31E-05
17938	Naca	mRNA	-0.264509176	1.78E-05
22260	Nr1h2	mRNA	0.206025164	0.013992569
21928	Tnfaip2	mRNA	-0.373622726	1.74E-05
319195	Rpl17	mRNA	-0.672216574	2.02E-16
231532	Arhgap24	mRNA	0.552324944	1.03E-06
68671	Pcyt2	mRNA	-0.223771689	0.005890351
53605	Nap1l1	mRNA	-0.227698415	4.52E-06
106894	Hmgxb3	mRNA	-0.460836804	8.56E-08
12982	Csf2ra	mRNA	0.437050996	0.024746022
19736	Rgs4	mRNA	-2.300294238	7.09E-23
54169	Kat6b	mRNA	0.434156774	3.18E-05
110109	Nop2	mRNA	-0.445073772	4.33E-12
108961	E2f8	mRNA	-0.395753455	2.48E-05
101612	Grwd1	mRNA	-0.588665613	3.77E-12
11520	Plin2	mRNA	-0.21778413	0.002487523
63953	Dusp10	mRNA	-0.404845851	4.15E-05
227737	Fam129b	mRNA	-0.233603451	2.22E-05
54401	Ywhab	mRNA	-0.17390797	0.001648398
208146	Yeats2	mRNA	-1.059139853	2.76E-51
12428	Ccna2	mRNA	-0.296570188	9.61E-09
269999	Orai3	mRNA	0.349868287	0.033727961
218629	Dhx29	mRNA	-0.310086876	0.00247536
13358	Slc25a1	mRNA	-1.010083813	1.08E-41
20186	Nr1h4	mRNA	-0.322761262	0.013803221
67832	Brix1	mRNA	-0.164389708	0.014656853
269700	Hectd4	mRNA	0.229699009	0.03445158
269152	Kif26b	mRNA	0.620348966	1.06E-10
12005	Axin1	mRNA	-0.201835933	0.004408449
93890	Pcdhb19	mRNA	0.656956761	0.023199772
54393	Gabbr1	mRNA	0.315963442	4.50E-04
107971	Frs3	mRNA	0.578075986	0.04834429
11428	Aco1	mRNA	0.369301651	1.50E-08
26396	Map2k2	mRNA	-0.16794693	0.014893533
102641463	Gm17175	mRNA	1.121500459	0.023596163
231931	Gimap6	mRNA	3.787700196	2.94E-06
547176	Zc3h12b	mRNA	0.327628505	0.037736026
268396	Sh3pxd2b	mRNA	0.208379555	0.013902825
12338	Capn6	mRNA	0.415593567	4.89E-10
229900	Gbp7	mRNA	0.298217374	0.002923483
67605	Akt1s1	mRNA	-0.226023177	0.005200232
70369	Bag5	mRNA	0.299483058	0.01101389
433940	Fam222a	mRNA	0.983169547	0.04756039
22249	Unc13b	mRNA	1.144308936	0.022974722
66147	Necap2	mRNA	-0.490649702	8.24E-07
93842	Igsf9	mRNA	0.694637985	8.81E-05
20442	St3gal1	mRNA	1.215248439	5.67E-18
94178	Mcoln1	mRNA	0.379224068	0.001227375
68292	Stt3b	mRNA	0.153782789	0.00814018
17390	Mmp2	mRNA	0.22800289	1.07E-04
170722	Nxf7	mRNA	2.790250111	1.74E-123
16969	Zbtb7a	mRNA	-0.227767413	0.006491951
68736	Tyw5	mRNA	-0.358734995	0.017858358
28135	Cep63	mRNA	-0.308646541	0.01169703
68028	Rpl22l1	mRNA	0.695304071	6.92E-10
50762	Fbxo6	mRNA	-0.29914322	0.010975688
231474	Paqr3	mRNA	0.676585542	7.44E-15
67534	Ttll4	mRNA	0.209013405	0.017666688
104445	Cdc42ep1	mRNA	0.242711055	7.26E-05
14319	Fth1	mRNA	-0.191441239	0.005614961
66148	Dnajc15	mRNA	-0.453164769	0.028440675
22329	Vcam1	mRNA	-2.042998925	1.08E-95
80912	Pum1	mRNA	-0.228404775	0.001115433
100609	Nsun5	mRNA	-0.327271214	0.014094185
18572	Pdcd11	mRNA	-0.25292008	0.001268674
52829	Lurap1l	mRNA	-0.843179619	1.01E-29
23849	Klf6	mRNA	-0.503100135	2.52E-14
17380	Mme	mRNA	1.514126194	4.33E-144
20341	Selenbp1	mRNA	1.86290045	0.013237262
17886	Myh9	mRNA	-0.335954071	4.77E-09
211652	Wwc1	mRNA	-0.478524863	2.19E-08
74012	Rap2b	mRNA	-0.235399592	0.043841728
72946	Lrrc47	mRNA	-0.489027551	3.14E-09
227800	Rabgap1	mRNA	0.178911732	0.038944126
22029	Traf1	mRNA	-1.061361319	0.003154519
27224	Eloa	mRNA	-0.368910921	5.56E-07
70425	Csnk1g3	mRNA	-0.298178111	7.04E-05
20411	Sorbs1	mRNA	0.767058302	1.10E-05
68695	Hddc3	mRNA	0.471773744	0.032464489
16648	Kpna3	mRNA	-0.239109543	3.99E-04
72057	Phf10	mRNA	0.202841492	0.001553806
219094	Khnyn	mRNA	0.424464435	1.87E-05
67465	Sf3a1	mRNA	-0.287272893	1.17E-05
232536	Mrps35	mRNA	-0.259340697	0.031268002
18121	Nog	mRNA	1.505583609	3.66E-33
77117	Zfp934	mRNA	0.477104622	0.004695141
70297	Gcc2	mRNA	0.223061074	0.007080688
52615	Suz12	mRNA	-0.241880459	7.61E-05
226551	Suco	mRNA	0.203959796	0.032642903
99681	Tchh	mRNA	1.336531057	2.02E-13
225895	Taf6l	mRNA	-0.297757376	0.019765694
11501	Adam8	mRNA	-0.812259173	1.23E-06
68836	Mrpl52	mRNA	-0.510944686	0.00234731
67417	Ears2	mRNA	-0.360240118	0.02596323
14548	Mrps33	mRNA	-0.210246366	0.045483486
140630	Ube4a	mRNA	0.241972249	0.005168505
106248	Qtrt2	mRNA	-0.537684617	8.23E-09
105675	Ppif	mRNA	-0.524365813	1.38E-04
15427	Hoxc9	mRNA	0.380031689	0.020680825
19268	Ptprf	mRNA	-0.373440235	3.08E-05
22628	Ywhag	mRNA	-0.260390315	1.46E-07
69577	Fastkd3	mRNA	-0.519451416	6.35E-04
74123	Foxp4	mRNA	0.177342841	0.025482325
234388	Ccdc124	mRNA	-0.268398891	0.042764536
74775	Lmbr1l	mRNA	0.441955682	1.09E-04
214855	Arid5a	mRNA	0.439832633	4.59E-04
108014	Srsf9	mRNA	-0.35866805	3.28E-06
26557	Homer2	mRNA	-1.93587228	3.91E-14
242915	Garem2	mRNA	-0.454119301	7.33E-04
29870	Gtse1	mRNA	-0.231179445	5.70E-04
109672	Cyb5a	mRNA	-0.760496855	7.92E-14
78777	Tepsin	mRNA	0.392908581	0.002453916
66394	Nosip	mRNA	-0.377498796	1.24E-04
20535	Slc4a2	mRNA	0.247559089	4.84E-05
98363	Efhd1	mRNA	2.488556299	0.033546965
381626	Rbm33	mRNA	0.192164533	0.036219067
16656	Hivep3	mRNA	-1.174053789	1.16E-09
57138	Slc12a5	mRNA	0.964426083	0.001505406
20336	Exoc4	mRNA	0.341522057	2.98E-04
19024	Ppfibp2	mRNA	1.756728628	1.05E-17
97761	Sgsm2	mRNA	0.336821687	5.20E-04
77593	Usp45	mRNA	0.423227086	3.79E-07
13353	Dgcr6	mRNA	-0.400194583	1.85E-04
103573	Xpo1	mRNA	-0.173990043	0.002897078
217463	Snx13	mRNA	0.489464512	3.27E-11
57344	As3mt	mRNA	-1.055017123	0.036190887
11669	Aldh2	mRNA	0.135621398	0.026793865
19128	Pros1	mRNA	-0.391894373	2.31E-08
16859	Lgals9	mRNA	-0.186291244	0.022165925
23947	Mid2	mRNA	0.241633348	0.013408713
27047	Omd	mRNA	1.033693688	1.96E-20
100972	Rab28	mRNA	-0.249185871	0.001572317
12070	Bex3	mRNA	-0.286821265	3.90E-04
209773	Dennd2a	mRNA	0.540978316	2.57E-14
18432	Mybbp1a	mRNA	-0.641635246	5.46E-41
79456	Recql4	mRNA	0.304088387	1.80E-04
23959	Nt5e	mRNA	1.446734244	5.61E-50
214162	Kmt2a	mRNA	0.253773166	0.018374591
14884	Gtf2h1	mRNA	-0.243590865	8.81E-04
240776	Kcnt2	mRNA	0.50184077	0.01143588
22025	Nr2c1	mRNA	0.257016912	0.043136976
13972	Gnb1l	mRNA	-0.744594475	2.40E-05
75007	Mindy1	mRNA	0.261145116	0.009808709
319581	Xkr5	mRNA	-3.191257101	0.00479966
102339	Cog4	mRNA	0.387309942	9.75E-05
19069	Nup88	mRNA	-0.132181113	0.046805992
140559	Igsf8	mRNA	-0.395311187	0.014027861
50799	Slc25a13	mRNA	-0.336505435	4.55E-04
434863	Gm15128	mRNA	1.623155494	1.42E-13
407812	Zfp941	mRNA	0.843001239	8.66E-05
110052	Dek	mRNA	-0.31817667	1.43E-09
170677	Cdhr1	mRNA	-2.770326086	2.89E-04
94065	Mrpl34	mRNA	-0.490047669	0.005547312
15364	Hmga2	mRNA	-1.77922281	4.63E-98
14787	Rhpn1	mRNA	0.939722285	1.07E-07
26407	Map3k4	mRNA	0.222878238	0.006949971
21934	Tnfrsf11a	mRNA	-3.991666614	0.005722506
70097	Sash1	mRNA	0.367889757	3.70E-08
17127	Smad3	mRNA	-0.182400773	0.010632845
67763	Prpsap1	mRNA	-0.301690899	8.54E-04
70591	5730455P16Rik	mRNA	0.340007085	9.12E-06
224598	Zfp758	mRNA	0.387202409	0.012583823
218333	Ice1	mRNA	0.454367956	2.80E-09
244954	Prss35	mRNA	-0.174948032	0.039280477
68052	Rps13	mRNA	-0.235684782	0.031068737
67495	Tmem167b	mRNA	0.260458188	0.001804891
17344	Pias2	mRNA	-0.502376292	2.65E-13
106565	Dlk2	mRNA	0.316858154	0.033865792
56316	Ggcx	mRNA	0.347141704	0.003144804
77422	C330018D20Rik	mRNA	-0.451668713	0.009628948
239559	A4galt	mRNA	0.947571197	2.90E-12
28081	Fam104a	mRNA	-0.246089805	0.008279749
18673	Phb	mRNA	-0.325108252	1.26E-06
12593	Cdyl	mRNA	-0.272930816	0.019572022
30960	Vapa	mRNA	-0.242608355	3.58E-04
268935	Scube3	mRNA	0.186210387	0.015566706
100859931	Gm20604	mRNA	-0.388859082	0.044953017
67042	Ift27	mRNA	0.263042461	0.021700183
211389	Suox	mRNA	0.538057823	4.89E-04
56615	Mgst1	mRNA	1.695287858	0.006523116
14057	Sfxn1	mRNA	-0.428203464	6.37E-07
228730	Kiz	mRNA	0.423356919	2.15E-04
270627	Taf1	mRNA	0.275399398	3.48E-06
93761	Smarca1	mRNA	-0.727651465	5.42E-06
70568	Cpne3	mRNA	0.382087831	2.98E-07
11443	Chrnb1	mRNA	0.999726244	4.31E-13
241075	Plekhm3	mRNA	0.30737959	0.018457824
17463	Psmd7	mRNA	-0.300962801	2.30E-05
74559	Elovl7	mRNA	-0.290637719	0.024814424
214137	Arhgap29	mRNA	0.338322246	7.03E-07
76302	Pcnp	mRNA	-0.241639701	4.65E-05
214572	Prmt7	mRNA	-0.34002199	0.005987773
246048	Chodl	mRNA	2.620143602	5.65E-04
219134	Shisa2	mRNA	2.086928853	0.003285482
56177	Olfm1	mRNA	-0.311253207	0.017543082
27384	Akr1c13	mRNA	1.00842642	3.25E-24
17068	Ly6d	mRNA	4.255980263	0.002107123
216049	Zfp365	mRNA	-0.267282144	0.013678132
68947	Chst8	mRNA	1.403735029	0.031382748
270106	Rpl13	mRNA	-0.257056201	6.74E-04
103712	6330403K07Rik	mRNA	1.21391956	0.016840458
234729	Vac14	mRNA	-0.211052183	0.048146597
211378	6720489N17Rik	mRNA	0.36590829	0.02770247
72935	Ddx41	mRNA	-0.454104004	1.31E-07
74570	Zkscan1	mRNA	0.282513262	0.003107798
666744	Gm8267	mRNA	0.942765042	0.003335954
74257	Tspan17	mRNA	0.359188493	0.045392779
72747	Ttc39c	mRNA	-0.402035192	0.003693653
269855	Ssc5d	mRNA	0.911692622	9.67E-26
65945	Clstn1	mRNA	-0.32193943	1.90E-08
70546	Zdhhc2	mRNA	1.048765034	2.54E-05
80288	Bcl9l	mRNA	0.381159612	1.47E-07
66395	Ahnak	mRNA	-0.363952425	2.78E-05
108755	Lyrm2	mRNA	0.496709386	0.008615573
17984	Ndn	mRNA	2.704240601	4.03E-74
20912	Stxbp3	mRNA	0.246017083	0.011484269
67105	Timm21	mRNA	-0.370317947	0.037968157
67996	Srsf6	mRNA	-0.122729302	0.048024409
269614	Pank4	mRNA	-0.474312061	9.82E-06
109246	Tspan9	mRNA	-0.342066792	3.24E-08
22601	Yap1	mRNA	-0.177216964	0.010492944
12648	Chd1	mRNA	-0.159631894	0.046724671
14870	Gstp1	mRNA	-0.449162693	2.50E-07
230101	Gba2	mRNA	0.923584598	7.65E-11
14084	Faf1	mRNA	-0.379068093	8.63E-06
330657	Prss53	mRNA	1.055193515	0.008428753
276919	Gemin4	mRNA	-0.278044537	0.002546718
17257	Mecp2	mRNA	0.378483684	1.23E-06
56361	Pus1	mRNA	-0.45743707	1.73E-05
11810	Apobec1	mRNA	0.73959619	0.001207418
244329	Mcph1	mRNA	-0.31566053	0.014055089
20935	Surf6	mRNA	-0.27334351	0.029642287
110854	Ptpa	mRNA	-0.190466514	0.003777021
56461	Kcnip3	mRNA	0.764450859	0.016945931
93888	Pcdhb17	mRNA	0.463535416	0.041932465
19075	Prim1	mRNA	0.261198358	6.64E-04
71898	Apol9b	mRNA	-0.574194956	8.60E-19
17126	Smad2	mRNA	-0.620502599	1.49E-18
207212	Arhgef17	mRNA	0.33278236	1.32E-06
66193	Pithd1	mRNA	-0.625393491	5.54E-08
71787	Trnau1ap	mRNA	-0.527568988	9.48E-04
57317	Srsf4	mRNA	-0.402854384	5.92E-08
68048	Aen	mRNA	-0.434439349	1.59E-06
11821	Aprt	mRNA	-0.559129643	3.02E-08
17537	Meis3	mRNA	1.115055046	4.83E-08
19062	Inpp5k	mRNA	0.239487554	0.037467781
622404	Ccdc107	mRNA	0.742591572	8.40E-12
16635	Klra4	mRNA	-1.609951056	6.70E-18
14772	Grk4	mRNA	0.542266632	3.30E-06
329260	Dennd1b	mRNA	0.46906818	2.60E-07
20463	Cox7a2l	mRNA	0.222332028	0.020206886
59027	Nampt	mRNA	-0.281357023	2.81E-04
74356	4931428F04Rik	mRNA	0.585155235	0.001626585
67579	Cpeb4	mRNA	0.358643632	1.01E-04
101055806	Gm10378	mRNA	0.775360715	3.60E-06
319845	Bbs9	mRNA	0.378551475	0.001787042
14183	Fgfr2	mRNA	-0.336280771	0.001239364
18526	Pcdh10	mRNA	2.210971956	5.48E-09
107995	Cdc20	mRNA	-0.98353424	5.44E-40
13435	Dnmt3a	mRNA	0.240211669	0.018077957
15951	Ifi204	mRNA	-0.307004831	0.00996313
18996	Pou4f1	mRNA	2.23639852	0.0469609
71927	Itfg1	mRNA	0.278636165	3.31E-04
14782	Gsr	mRNA	-0.542612307	1.71E-06
66290	Atp6v1g1	mRNA	-0.255312815	0.003596711
21803	Tgfb1	mRNA	-0.366049889	5.35E-05
81500	Sil1	mRNA	-0.265761243	0.030264386
240261	Ccdc112	mRNA	-0.467833525	0.003391518
21371	Tbca	mRNA	-0.374159158	2.91E-05
231214	Cc2d2a	mRNA	0.41381067	2.93E-05
66054	Cndp2	mRNA	-0.855637558	2.24E-16
12349	Car2	mRNA	-1.610038542	5.41E-05
56289	Rassf1	mRNA	-0.298809209	5.93E-04
12856	Cox17	mRNA	-0.812979517	3.85E-09
105988	Espl1	mRNA	-0.240873311	0.001082626
74777	Selenon	mRNA	-0.299990755	4.86E-06
226101	Myof	mRNA	-0.181066771	0.007563591
56454	Aldh18a1	mRNA	0.21442999	7.49E-04
238871	Pde4d	mRNA	-0.52948771	9.25E-04
30937	Lmcd1	mRNA	0.533066025	5.88E-05
215387	Ncaph	mRNA	-0.210047478	0.00151435
76457	Ccdc134	mRNA	0.301642402	7.88E-04
630579	Zfp808	mRNA	0.25902652	0.044550238
53356	Eif3g	mRNA	-0.264655662	0.001460033
74254	Gpn1	mRNA	-0.250544313	0.011478479
19285	Cavin1	mRNA	-0.486044866	1.79E-23
320595	Phf8	mRNA	0.258287413	0.003778314
13110	Cyp2j6	mRNA	0.427191363	6.18E-04
244962	Snx14	mRNA	0.498046202	1.08E-09
218397	Rasa1	mRNA	-0.223931079	0.004952228
218989	Tmem260	mRNA	0.557273243	1.79E-05
67755	Ddx47	mRNA	-0.272618958	2.19E-04
66711	Sbds	mRNA	-0.45167383	4.72E-07
381353	Ajm1	mRNA	0.484643467	0.042173725
234852	Chmp1a	mRNA	-0.29465776	8.57E-04
26949	Vat1	mRNA	-0.358796906	6.19E-13
68046	2700062C07Rik	mRNA	-0.442166523	0.003725295
15191	Hdgf	mRNA	-0.546323637	1.51E-23
212943	Tent5a	mRNA	0.485682575	1.90E-07
109815	Selenos	mRNA	0.216867927	0.015624451
66949	Trim59	mRNA	-0.153921339	0.017957589
108937	Rnf169	mRNA	0.298723481	0.01101389
76117	Arhgap15	mRNA	0.783085013	6.00E-04
50789	Fbxl3	mRNA	0.23142696	0.01971087
13405	Dmd	mRNA	4.227056593	1.52E-14
20877	Aurkb	mRNA	-0.554347844	4.30E-17
76500	Ip6k2	mRNA	0.325593034	9.12E-04
58520	Erg28	mRNA	-0.253642552	0.021190502
225164	Mib1	mRNA	-0.356800431	1.19E-04
66168	Grina	mRNA	0.382109582	2.02E-16
16500	Kcnb1	mRNA	1.190349381	5.90E-05
19732	Rgl2	mRNA	0.517427628	1.28E-06
277360	Prex1	mRNA	1.121105596	1.60E-11
69082	Zc3h15	mRNA	-0.17091246	0.019356054
170719	Oxr1	mRNA	-0.396688025	4.16E-12
16328	Cep250	mRNA	0.28837402	6.97E-04
665001	Gm14391	mRNA	0.295290332	0.005138239
57320	Park7	mRNA	-0.341219043	7.30E-04
20222	Sf3a2	mRNA	-0.281166447	3.02E-04
15902	Id2	mRNA	-2.397618003	8.64E-73
239647	Pced1b	mRNA	1.13077922	7.62E-09
78830	Slc25a12	mRNA	-0.344711206	1.54E-05
70420	Arpin	mRNA	-0.181579734	0.034735783
15937	Ier3	mRNA	-0.618406968	4.53E-09
68693	Hnrnpul2	mRNA	0.149902977	0.026276976
19941	Rpl26	mRNA	-0.229375435	0.006079507
67768	N6amt1	mRNA	-0.387198128	0.002129927
21987	Tpd52l1	mRNA	0.847736803	4.76E-05
329739	Fam102b	mRNA	0.399519304	1.28E-08
18949	Pnn	mRNA	-0.182565949	0.003790234
20499	Slc12a7	mRNA	-0.159252725	0.044913713
272551	Gins2	mRNA	-0.23350029	0.024055937
17156	Man1a2	mRNA	0.266756868	8.09E-05
264895	Acsf2	mRNA	-0.201881097	0.018317387
57431	Dnajc4	mRNA	0.416895173	0.043904215
269470	Wdr3	mRNA	-0.219418276	0.009811762
22589	Atrx	mRNA	0.546431554	4.04E-18
107272	Psat1	mRNA	-0.11807436	0.031114533
223752	Gramd4	mRNA	-0.322668672	3.94E-04
66197	Cks2	mRNA	-0.494441239	4.51E-07
66849	Ppp1r2	mRNA	-1.358603893	5.54E-114
19290	Pura	mRNA	-0.259855532	0.005388789
76793	Snip1	mRNA	-0.410651286	4.00E-04
30935	Tor3a	mRNA	0.434348123	3.76E-07
98193	Dcaf8	mRNA	0.212120848	0.002892157
58250	Chst11	mRNA	0.405814199	1.21E-04
21346	Tagln2	mRNA	-0.371445851	3.19E-10
19713	Ret	mRNA	0.906075066	0.00907294
73729	Zfp383	mRNA	0.513081177	0.001811022
546336	Prrg1	mRNA	0.446789733	8.82E-05
58998	Nectin3	mRNA	0.297215171	0.003740079
15478	Hs3st3a1	mRNA	0.87619934	1.96E-06
76295	Atp11b	mRNA	0.262961688	4.38E-04
51885	Tubgcp4	mRNA	0.320766085	4.23E-06
107271	Yars	mRNA	-0.461191741	1.99E-13
320080	Zbtb39	mRNA	0.357148179	9.69E-04
18606	Enpp2	mRNA	0.914452005	5.05E-27
71687	Tmem25	mRNA	1.139030334	0.002971576
17855	Mvk	mRNA	-0.53787438	1.99E-10
26422	Nbea	mRNA	0.23770876	0.03627746
56488	Nxt1	mRNA	-0.299712173	0.01084423
18627	Per2	mRNA	0.479474417	0.001483097
19181	Psmc2	mRNA	-0.281376877	5.71E-06
192662	Arhgdia	mRNA	-0.205731242	6.39E-05
106393	Srl	mRNA	-0.719895263	0.014264776
68394	Ccdc163	mRNA	-0.492133164	0.017141727
26563	Ror1	mRNA	0.954194242	0.015232921
23972	Papss2	mRNA	-0.333934625	9.47E-04
21881	Tkt	mRNA	-0.386410311	2.12E-09
14369	Fzd7	mRNA	0.401308025	6.17E-09
211770	Trib1	mRNA	-0.409366329	9.61E-06
81879	Tfcp2l1	mRNA	1.129858852	0.005008173
108169043	Gm46911	mRNA	0.280629805	0.00171048
433702	Ncbp1	mRNA	0.582990677	2.26E-27
12890	Cplx2	mRNA	0.466641378	3.01E-04
29807	Tpk1	mRNA	0.731714733	0.024973334
13858	Eps15	mRNA	-0.232507723	0.001818288
17130	Smad6	mRNA	-0.496568058	0.004806967
12737	Cldn1	mRNA	-6.012285787	3.18E-07
20296	Ccl2	mRNA	-0.72795296	6.67E-23
93760	Arid1a	mRNA	-0.475845384	4.58E-10
407819	BC031181	mRNA	-0.450683719	6.19E-05
71591	Zfp251	mRNA	0.301879077	3.27E-04
114663	Impa2	mRNA	-0.635355321	8.51E-05
26462	Txnrd2	mRNA	-0.688368207	1.78E-04
15416	Hoxb8	mRNA	1.428903509	3.55E-07
18643	Pfn1	mRNA	-0.519160469	7.42E-12
628705	Phf11c	mRNA	2.23292404	0.012883845
19349	Rab7	mRNA	-0.132881072	0.010598602
109232	Sccpdh	mRNA	0.215760123	0.029786145
72157	Pgm2	mRNA	-0.325973882	2.33E-04
69736	Nup37	mRNA	-0.5552429	1.02E-06
26413	Mapk1	mRNA	-0.525828224	1.27E-25
230082	Nol6	mRNA	0.192535166	0.01129128
73671	Sult6b1	mRNA	1.624095239	0.01030527
57741	Noc2l	mRNA	-1.023634388	1.07E-33
214444	Cdk5rap2	mRNA	-0.202323167	0.01189886
208164	Fam180a	mRNA	0.864787705	1.81E-08
21912	Tspan7	mRNA	0.312501752	0.005850807
21754	Tesk1	mRNA	0.532028548	1.52E-15
272347	Zfp398	mRNA	0.649803798	3.63E-09
217980	Larp4b	mRNA	-0.27820315	2.57E-04
74164	Nfx1	mRNA	0.494206895	7.65E-17
21887	Tle3	mRNA	-0.383859429	1.01E-05
66066	Gng11	mRNA	0.50164867	2.05E-04
66576	Uqcrh	mRNA	-0.399401261	5.38E-04
64652	Nisch	mRNA	0.251811524	3.53E-04
106957	Slc39a6	mRNA	-0.264207979	1.54E-04
171095	Il17rc	mRNA	0.311179843	2.19E-05
108682	Gpt2	mRNA	0.305818234	6.67E-05
69724	Rnaseh2a	mRNA	-0.451322704	5.91E-04
19775	Xpr1	mRNA	0.261834647	0.003984089
67091	Trappc6a	mRNA	0.760103441	1.83E-06
15258	Hipk2	mRNA	-0.31355209	7.71E-04
20525	Slc2a1	mRNA	-0.410634843	3.12E-07
53627	Porcn	mRNA	0.629560851	2.51E-04
70892	Ttll7	mRNA	0.415443918	1.19E-07
11877	Arvcf	mRNA	-0.522957209	6.13E-06
67087	Ctnnbip1	mRNA	-0.58055961	3.55E-08
55944	Eif3d	mRNA	-0.188366807	2.83E-04
17158	Man2a1	mRNA	-0.220039151	0.018536033
14594	Ggta1	mRNA	-0.571175891	8.72E-09
17764	Mtf1	mRNA	-0.274179229	0.031760763
17082	Il1rl1	mRNA	-1.82692741	2.38E-62
51798	Ech1	mRNA	-0.318279513	0.034682418
13601	Ecm1	mRNA	0.27658342	3.94E-05
381695	N4bp2l2	mRNA	0.241413698	0.003682547
72124	Seh1l	mRNA	-0.425697216	3.66E-08
56703	Pigo	mRNA	0.940120004	3.57E-19
140742	Sesn1	mRNA	0.278266628	0.041774641
83397	Akap12	mRNA	-0.474220963	4.93E-14
226541	Klhl20	mRNA	0.370783001	4.88E-04
74754	Dhcr24	mRNA	-0.881765137	5.47E-43
269637	Cnpy1	mRNA	4.398726895	0.001209984
66048	Emc6	mRNA	-0.197432074	0.043787703
68146	Arl13b	mRNA	-0.488192301	5.31E-10
74760	Rab3il1	mRNA	1.032017908	2.93E-38
23983	Pcbp1	mRNA	-0.191736205	0.002354215
212124	Cfap46	mRNA	1.0243019	0.01293301
54519	Apbb1ip	mRNA	-0.528477784	7.57E-13
16002	Igf2	mRNA	-0.612551747	9.75E-08
52028	Bbs1	mRNA	0.373893153	0.019183579
72345	Amer1	mRNA	0.509708201	4.31E-11
104725	Sptssa	mRNA	-0.37626352	9.16E-04
100503043	Armcx4	mRNA	0.503869454	3.39E-04
192193	Edem1	mRNA	0.169107258	0.017872619
234549	Heatr3	mRNA	-0.290963983	3.57E-04
74016	Phf19	mRNA	-4.730143658	1.28E-07
209387	Trim30d	mRNA	-1.594327477	1.19E-04
22192	Ube2m	mRNA	-0.202971176	0.029723581
18221	Nudc	mRNA	-0.764418884	9.64E-23
56489	Ikbke	mRNA	0.600639086	2.92E-05
12387	Ctnnb1	mRNA	-0.127505945	0.032247245
209630	Frmd4a	mRNA	-0.48016436	2.31E-09
277396	Klhl23	mRNA	0.253615588	0.00743691
212163	8030462N17Rik	mRNA	-0.378708482	0.001971305
241447	Cers6	mRNA	0.287294626	0.001837186
68262	Agpat4	mRNA	0.303353262	0.001865822
12261	C1qbp	mRNA	-0.55485888	1.68E-16
243834	Zfp324	mRNA	0.287211475	0.040132575
16432	Itm2b	mRNA	0.346907823	4.55E-11
66559	Metap1d	mRNA	0.235116785	0.029373654
236511	Ago1	mRNA	-0.26777898	5.52E-04
68703	Rere	mRNA	-0.177024373	0.03333938
57908	Zfp318	mRNA	0.301101278	0.009628948
382075	Odf3l1	mRNA	1.46088748	0.001482561
330627	Trim66	mRNA	0.886455746	1.55E-22
26912	Gcat	mRNA	-0.450830628	4.18E-04
21915	Dtymk	mRNA	-0.228523544	0.011816406
213827	Arcn1	mRNA	0.162657942	0.003955171
56530	Cnpy2	mRNA	0.338442651	3.08E-05
21345	Tagln	mRNA	-4.063422844	5.82E-14
17775	Laptm4a	mRNA	0.318907933	4.35E-10
59069	Tpm3	mRNA	-0.289616459	1.15E-07
14732	Gpam	mRNA	-0.238450919	0.040835319
109552	Sri	mRNA	0.240081919	0.002595861
50883	Chek2	mRNA	-0.323357842	0.003540142
67896	Ccdc80	mRNA	0.219852218	1.18E-05
19720	Trim27	mRNA	-0.405552981	1.69E-06
57080	Gtf2ird1	mRNA	-0.148167136	0.032395046
66352	Blzf1	mRNA	0.289737551	0.007936471
213452	Dstyk	mRNA	0.474166072	5.87E-08
321022	Cdv3	mRNA	0.142614845	0.018127217
110075	Bmp3	mRNA	-5.863451509	1.34E-99
14132	Fcgrt	mRNA	0.437959724	5.38E-07
22224	Usp10	mRNA	-0.281207363	0.001616534
207181	Rbms3	mRNA	1.067277628	7.82E-14
22143	Tuba1b	mRNA	-0.143991092	0.007603252
328329	Mast4	mRNA	-0.280060699	0.011155215
76559	Atg2b	mRNA	0.237527124	0.005239159
23943	Esyt1	mRNA	0.625068513	8.75E-23
68050	Akirin1	mRNA	-0.282837329	2.50E-04
18218	Dusp8	mRNA	0.324796241	0.00138723
668382	Pabpc1l2b-ps	pseudo	2.606320873	0.028095183
12457	Noct	mRNA	-0.32789233	4.71E-04
69590	Gpx8	mRNA	0.227182263	0.005372026
14567	Gdi1	mRNA	0.172446741	0.002666013
216131	Trappc10	mRNA	0.163015108	0.036061825
100861708	Gm21154	mRNA	1.060351664	1.84E-13
107503	Atf5	mRNA	0.425079366	5.72E-13
104111	Adcy3	mRNA	-0.885551155	3.25E-12
224045	Eif2b5	mRNA	-1.325196878	8.35E-98
675812	Zfp605	mRNA	0.505676131	0.01527783
381802	Tsen2	mRNA	-0.656574831	2.71E-05
225339	Ammecr1l	mRNA	-0.307376285	2.89E-04
77110	Gpbp1l1	mRNA	-0.296774733	4.62E-04
110639	Prps2	mRNA	-0.282472213	3.23E-05
93679	Trim8	mRNA	-0.209805146	0.029379828
100041433	Zfp981	mRNA	0.487055576	0.04043385
67052	Ndc80	mRNA	-0.377396954	1.02E-05
69136	Tusc1	mRNA	-0.612184569	0.001436849
77782	Polq	mRNA	-0.838280979	2.06E-21
140499	Ube2j2	mRNA	-0.629167279	8.11E-14
16194	Il6ra	mRNA	0.546174657	0.007697105
11881	Arsb	mRNA	0.19514383	0.016610602
102644	Oaf	mRNA	0.205682324	0.029292509
229474	Fhdc1	mRNA	-1.179720255	3.12E-09
76510	Trappc9	mRNA	0.265932445	0.001491847
433801	Gm13212	mRNA	1.816031789	1.59E-65
338349	Cntln	mRNA	-0.445503526	1.79E-04
22221	Ubp1	mRNA	0.159739949	0.034303856
71338	Tprg	mRNA	-2.248371367	0.011465709
320244	Ttll5	mRNA	0.28296039	0.008844399
74486	Osbpl10	mRNA	-0.663714427	0.046077467
103694	Tmed4	mRNA	0.57854435	4.80E-15
13047	Cux1	mRNA	0.392529279	1.23E-09
98956	Nat10	mRNA	-0.318019939	2.72E-04
27756	Lsm2	mRNA	-0.265538109	0.013803221
193670	Rnf185	mRNA	0.198002877	0.012903656
18516	Pbx3	mRNA	0.418433109	4.54E-06
17190	Mbd1	mRNA	-0.473141409	2.19E-08
194388	Tet3	mRNA	0.278322365	7.74E-05
93762	Smarca5	mRNA	-0.12861983	0.045532317
56457	Clptm1	mRNA	0.325360509	2.27E-07
22441	Xlr	mRNA	-0.621951893	1.89E-08
27055	Fkbp9	mRNA	0.208486376	1.91E-04
68859	Smim1	mRNA	-0.808009949	0.042907199
100702	Gbp6	mRNA	0.751596692	1.60E-10
14043	Ext2	mRNA	0.213235266	3.65E-04
13026	Pcyt1a	mRNA	-1.056892386	1.60E-74
74081	Cep350	mRNA	0.323978585	7.87E-05
72404	Wdr44	mRNA	0.28060185	0.030151728
71838	Phf7	mRNA	-0.603965203	0.048935293
11826	Aqp1	mRNA	-0.289248823	9.79E-04
319636	Fsd1l	mRNA	-0.461541891	0.011982715
13823	Epb41l3	mRNA	-0.327469677	5.36E-09
26445	Psmb2	mRNA	-0.516312381	7.55E-13
211914	Asap2	mRNA	0.60216347	2.06E-04
210503	Zfp677	mRNA	0.791204482	0.027789908
67665	Dctn4	mRNA	-0.378457274	2.74E-08
17869	Myc	mRNA	-0.620809408	1.36E-22
19218	Ptger3	mRNA	1.935436118	0.041005292
216725	Adamts2	mRNA	0.811719092	1.16E-17
68980	Wdr53	mRNA	-1.138954601	6.50E-20
209027	Pycr1	mRNA	0.572417581	1.75E-11
81000	Rad54l2	mRNA	0.227216274	0.010223281
18569	Pdcd4	mRNA	-0.413827978	1.24E-04
69710	Arap1	mRNA	0.236991732	0.001051451
103136	Pwp1	mRNA	-0.183753981	0.032100581
93732	Acox2	mRNA	1.035197646	1.54E-04
24052	Sgcd	mRNA	0.809300395	4.10E-15
17191	Mbd2	mRNA	-0.315558662	2.10E-06
57874	Hacd3	mRNA	0.452261518	7.18E-11
140486	Igf2bp1	mRNA	-0.369452916	5.04E-06
11717	Ampd3	mRNA	-0.949035426	6.99E-09
228836	Dlgap4	mRNA	0.261546684	0.001333006
72144	Slc37a3	mRNA	0.315911048	1.23E-04
75646	Rai14	mRNA	-0.183498194	0.016576225
192663	Abcg4	mRNA	0.672569091	0.045320967
108012	Ap1s2	mRNA	0.486165095	8.40E-09
19385	Ranbp1	mRNA	-0.807383602	9.22E-32
210009	Mtrr	mRNA	-0.362769407	0.004825353
14863	Gstm2	mRNA	0.376345913	8.68E-07
12034	Phb2	mRNA	-0.488233728	6.30E-15
70315	Hdac8	mRNA	0.328948795	2.45E-04
13838	Epha4	mRNA	1.062938034	3.55E-04
14182	Fgfr1	mRNA	0.312612942	3.47E-08
229488	Fam160a1	mRNA	0.56212239	2.17E-05
320292	Rasgef1b	mRNA	0.581969025	0.014114967
56325	Abcb9	mRNA	1.361192992	0.019477145
20224	Sar1a	mRNA	0.185699015	0.001678897
50781	Dkk3	mRNA	-1.956082024	4.96E-118
252967	Ropn1l	mRNA	-1.194262041	0.011353823
170756	Slc8b1	mRNA	0.520378721	8.83E-05
21357	Tarbp2	mRNA	-0.268819492	0.001806805
22234	Ugcg	mRNA	-0.44698799	6.06E-09
19731	Rgl1	mRNA	-0.298389751	0.036430229
106344	Rfc4	mRNA	-1.377613186	4.44E-72
27062	Cadps	mRNA	5.774778879	2.39E-04
13803	Enc1	mRNA	-0.257466555	0.010694357
230674	Kdm4a	mRNA	-0.220553128	0.00490693
15469	Prmt1	mRNA	-0.346293898	1.92E-07
16975	Lrp8	mRNA	-0.341912894	3.19E-06
317758	Gimap9	mRNA	1.214639034	8.60E-05
382639	Zbtb42	mRNA	0.584269155	0.019071734
16886	Limk2	mRNA	0.271831276	9.79E-04
65107	Lrp10	mRNA	0.190721486	0.006059923
237877	Atad5	mRNA	0.210422195	0.009455531
100213	Rusc2	mRNA	0.447109807	4.51E-08
239393	Lrp12	mRNA	0.241813855	0.002257099
21872	Tjp1	mRNA	0.19883617	0.006661527
56503	Ankrd49	mRNA	-0.265825595	0.022907805
26397	Map2k3	mRNA	-0.665387327	4.30E-20
66734	Map1lc3a	mRNA	0.271932118	0.001914564
208211	Alg1	mRNA	0.23389573	0.034028659
63913	Fam129a	mRNA	0.472599648	8.45E-11
19060	Ppp5c	mRNA	-0.262440796	3.51E-04
75746	Morc4	mRNA	0.435820256	1.35E-11
70122	Mllt3	mRNA	-0.574170069	8.36E-12
195727	Nhs	mRNA	0.612308382	5.62E-06
56332	Amotl2	mRNA	-0.502754484	2.68E-24
67501	Ccdc50	mRNA	-1.189892465	2.72E-81
67936	Wdr55	mRNA	-0.625633264	1.98E-07
101056159	LOC101056159	mRNA	1.243804765	9.41E-11
246316	Lgi2	mRNA	-3.750937014	5.06E-09
192678	Rassf3	mRNA	-0.343493626	0.015618821
170758	Rac3	mRNA	1.021818111	0.003735903
14299	Ncs1	mRNA	-0.238785647	0.002698367
209707	Lcorl	mRNA	0.347153361	1.36E-04
22436	Xdh	mRNA	-0.256116369	7.20E-04
110750	Cse1l	mRNA	-0.190259652	0.002174045
210172	Zfp526	mRNA	0.404501958	0.035095145
22319	Vamp3	mRNA	-0.67145453	1.13E-13
14688	Gnb1	mRNA	-0.468515259	5.83E-22
18117	Emc8	mRNA	-0.217497672	0.046660523
171285	Havcr2	mRNA	-1.789964966	6.06E-04
24010	Ik	mRNA	-0.156895039	0.024655439
74148	Cluh	mRNA	-0.586982184	4.62E-22
104457	0610010K14Rik	mRNA	-0.37653139	0.002081654
73379	Dcbld2	mRNA	-0.336512349	7.20E-07
69077	Psmd11	mRNA	-0.236950031	1.78E-04
11964	Atp6v1a	mRNA	0.168977119	0.004478778
22232	Slc35a2	mRNA	0.456338529	2.95E-06
13557	E2f3	mRNA	-0.208964277	0.023151252
11502	Adam9	mRNA	0.236180898	0.001743527
100087	Kti12	mRNA	-0.714956641	3.34E-10
104252	Cdc42ep2	mRNA	-0.39946071	0.017443089
268465	Eme1	mRNA	-0.280533894	0.017357322
16476	Jun	mRNA	-0.460079915	2.44E-10
216766	Gemin5	mRNA	-0.471468659	5.88E-11
53623	Gria3	mRNA	-3.773716067	3.07E-21
217666	L2hgdh	mRNA	-0.463243724	7.26E-04
22123	Psmd3	mRNA	-0.376102064	4.29E-11
21762	Psmd2	mRNA	-1.37585441	1.33E-204
19200	Pstpip1	mRNA	0.368341827	0.013324072
22411	Wnt11	mRNA	1.393248111	0.008301467
219249	Tdrd3	mRNA	0.3310965	0.006688172
56550	Ube2d2a	mRNA	-0.484300442	3.33E-17
27273	Pdk4	mRNA	-0.434282341	7.53E-09
237178	Ppef1	mRNA	0.687435372	1.28E-20
276846	Pigs	mRNA	0.290662169	1.70E-04
20677	Sox4	mRNA	0.611279789	8.29E-24
12962	Crybb3	mRNA	2.128355226	0.005398273
79202	Tnfrsf22	mRNA	-0.338448521	0.002775994
71514	Sfpq	mRNA	-0.139400859	0.010396
74478	Snx29	mRNA	0.839390702	1.95E-04
237436	Gas2l3	mRNA	-0.281551245	2.37E-04
69020	Zfp707	mRNA	0.335326096	0.015933311
54670	Atp8b1	mRNA	-3.487092787	3.51E-05
224792	Adgrf5	mRNA	1.097492948	3.01E-05
241322	Zbtb6	mRNA	0.289344223	0.007304001
105242453	LOC105242453	mRNA	0.942156852	0.008058172
11722	Amy1	mRNA	1.65711399	0.038500612
225908	Myrf	mRNA	-0.649289929	0.0180342
19166	Psma2	mRNA	-0.323680839	6.38E-06
232853	Zfp954	mRNA	0.38033375	0.047540238
56375	B4galt4	mRNA	-1.065568454	4.45E-19
219148	Fam167a	mRNA	1.313374747	1.66E-63
53611	Vti1a	mRNA	0.215192898	0.045956277
14069	F8	mRNA	0.542996074	5.80E-04
11852	Rhob	mRNA	0.473870721	1.99E-09
331416	Gm773	mRNA	-2.791400885	0.009211747
15081	H3f3b	mRNA	0.213290927	1.40E-05
99929	Tiparp	mRNA	0.244842623	4.58E-04
67694	Ift74	mRNA	-0.503361578	1.53E-10
225467	Pggt1b	mRNA	-0.388789434	3.93E-06
328234	Rnf182	mRNA	1.378440517	6.80E-06
223697	Sun2	mRNA	-0.146327116	0.015975708
16337	Insr	mRNA	0.323359582	5.25E-04
67526	Atg12	mRNA	-0.437733277	8.92E-06
231801	Agfg2	mRNA	-0.406414109	2.28E-06
56055	Gtpbp2	mRNA	0.437264871	1.50E-10
23794	Adamts5	mRNA	-1.107055882	1.54E-56
12316	Aspm	mRNA	0.21799135	0.027539607
208777	Sned1	mRNA	1.3095098	3.03E-22
108679	Cops8	mRNA	-0.336076357	1.06E-06
68427	Slc39a13	mRNA	0.241522928	0.00233978
11819	Nr2f2	mRNA	-0.727584257	6.44E-21
75209	Sv2c	mRNA	-4.84121883	0.002343612
68533	Mphosph6	mRNA	-0.300757397	0.045079788
13664	Eif1a	mRNA	-0.853205911	2.06E-45
103425	Ncln	mRNA	-0.171536367	0.017936381
19383	Raly	mRNA	-0.148783316	0.018280378
18648	Pgam1	mRNA	-0.386980421	4.70E-15
100210	Gpn2	mRNA	-0.484751887	0.003610838
223672	Apol9a	mRNA	-0.471407373	1.20E-13
17713	Grpel1	mRNA	-0.243577263	0.001831582
242466	Zfp462	mRNA	0.663800759	1.63E-10
66390	Prelid3b	mRNA	-0.175605007	0.022353949
228355	Madd	mRNA	0.482300943	1.75E-04
17159	Man2b1	mRNA	0.377744265	3.51E-05
18738	Pitpna	mRNA	-0.201976717	0.002414633
106794	Dhx57	mRNA	0.484253343	1.28E-07
77721	Mrps5	mRNA	-0.241906488	0.010110373
74200	Khdc4	mRNA	0.275515657	1.28E-04
225579	Slc27a6	mRNA	1.266391212	0.019882201
320587	Tmem88b	mRNA	1.903776743	0.001323371
116872	Serpinb7	mRNA	1.701689077	8.62E-35
78885	Coro7	mRNA	0.408979425	3.05E-04
71839	Osgin1	mRNA	-0.626309475	8.54E-04
68291	Mto1	mRNA	-0.385423177	0.003706708
70314	Rabep2	mRNA	-0.290570921	0.009608602
21771	Utp4	mRNA	-0.443955696	2.22E-07
70757	Hacd2	mRNA	-0.554246776	1.29E-13
73473	Iws1	mRNA	-0.275122319	9.09E-04
67876	Coq10b	mRNA	-0.323153424	0.002023648
12013	Bach1	mRNA	0.287459688	7.99E-04
109267	Ssc4d	mRNA	-1.122659174	0.018593787
83962	Btbd1	mRNA	0.255616095	0.001053064
14205	Vegfd	mRNA	-0.215511747	0.031828179
67260	Cers4	mRNA	-5.006282758	7.90E-07
12313	Calm1	mRNA	0.173980853	4.19E-04
69737	Ttl	mRNA	-0.218604007	0.024253773
69257	Elf2	mRNA	0.184664046	0.02834652
239188	Enox1	mRNA	0.648354027	0.004327098
15499	Hsf1	mRNA	-0.239662031	4.90E-04
380840	Lyrm4	mRNA	-0.4110205	0.018430763
216558	Ugp2	mRNA	-0.300954538	5.35E-05
14621	Gjb4	mRNA	-0.4497851	0.047976581
17472	Gbp4	mRNA	0.745282898	1.39E-06
381201	Ap5b1	mRNA	0.445203176	0.044202978
19302	Pex2	mRNA	0.28465098	0.003054094
66523	2810004N23Rik	mRNA	-0.348907201	0.018584802
19221	Ptgfrn	mRNA	0.163487628	0.009217244
381546	Ccdc24	mRNA	-1.277759055	1.24E-06
212073	Syne3	mRNA	-0.417616061	0.002339396
74051	Steap2	mRNA	-0.266308083	1.04E-04
320253	3-Mar	mRNA	-0.76641028	5.75E-04
16498	Kcnab2	mRNA	-0.353591055	0.026364437
71949	Cers5	mRNA	0.16828751	0.003887348
52323	Klhl7	mRNA	1.152134755	2.29E-32
114863	Plpbp	mRNA	-0.292198647	0.006582271
26394	Lypla2	mRNA	-0.320455742	2.53E-04
54720	Rcan1	mRNA	0.286880946	0.003285482
74469	Taf7l	mRNA	1.500017331	1.05E-22
319765	Igf2bp2	mRNA	-1.290480342	2.10E-137
100163	Pafah2	mRNA	-0.628155561	2.54E-04
225998	Rorb	mRNA	-0.792589018	0.002270773
320825	Samd5	mRNA	1.17671843	2.08E-11
279561	Wnk3	mRNA	0.334720924	0.043840226
213895	Bms1	mRNA	-0.252024899	1.45E-04
278097	Armcx6	mRNA	-1.479371144	3.10E-05
109263	Rlf	mRNA	-0.287419917	0.001554085
26903	Dysf	mRNA	-0.267247593	0.001113729
100042175	Gm10230	mRNA	2.284101946	1.66E-12
12006	Axin2	mRNA	1.534188725	3.20E-53
18107	Nmt1	mRNA	-0.250127615	1.35E-04
77976	Nuak1	mRNA	0.73980493	1.31E-27
67830	Rer1	mRNA	-0.281537407	0.00206637
56462	Mtch1	mRNA	0.340401165	6.97E-09
18208	Ntn1	mRNA	-0.806996398	3.07E-29
73340	Nptxr	mRNA	0.414865222	8.98E-06
110198	Akr7a5	mRNA	-0.472791615	2.07E-04
269016	Sh3rf2	mRNA	-0.37623861	3.55E-04
66537	Pomp	mRNA	-0.238909498	0.01777044
73710	Tubb2b	mRNA	-4.63541446	1.29E-81
239839	Ccdc14	mRNA	-0.73672114	8.49E-13
24001	Tiam2	mRNA	-0.403566945	2.12E-07
20348	Sema3c	mRNA	0.865857511	3.73E-52
84113	Ptov1	mRNA	0.19671603	0.008159299
228775	Trib3	mRNA	0.400462798	2.62E-08
14789	P3h3	mRNA	0.239716697	0.042005708
20901	Strap	mRNA	-0.322004265	6.47E-09
75296	Fgfr1op	mRNA	-0.376993986	1.80E-04
11947	Atp5b	mRNA	-0.173848165	0.00129162
54645	Gripap1	mRNA	0.324276775	2.45E-04
56351	Ptges3	mRNA	-0.205617947	7.42E-04
22381	Tceal9	mRNA	0.156239122	0.024249647
54381	Cpq	mRNA	0.938077776	4.72E-27
76820	Fam49a	mRNA	1.963751201	0.010927844
218210	Nup153	mRNA	-0.262172574	0.002205742
226922	Kcnq5	mRNA	-5.440714179	4.27E-08
101056073	Zfp990	mRNA	0.96815183	4.15E-09
12447	Ccne1	mRNA	-0.627345956	4.71E-14
107528	Magee1	mRNA	0.306832424	6.36E-04
67591	Ubl4b	mRNA	6.006735474	1.25E-04
100017	Ldlrap1	mRNA	-0.539724768	1.41E-08
226861	Hhat	mRNA	0.493720075	0.036423337
269593	Luzp1	mRNA	-0.313537512	6.43E-05
27096	Trappc3	mRNA	-0.223957279	0.015471754
56273	Pex14	mRNA	-0.458447349	1.30E-06
217219	Fam171a2	mRNA	0.40699903	1.57E-05
68278	Ddx39	mRNA	-0.476154707	1.56E-07
14283	Fosl1	mRNA	-1.201245647	2.44E-21
66175	Mustn1	mRNA	-0.840166945	4.83E-07
100042295	Gm3776	mRNA	-3.148681577	9.96E-04
227699	Nup188	mRNA	-0.226478851	0.003061934
65020	Zfp110	mRNA	0.405067375	1.58E-06
77591	Ddx10	mRNA	-0.327270577	3.86E-05
79566	Sh3bp5l	mRNA	-0.233039506	0.020857068
66614	Gpatch4	mRNA	-0.283108296	0.007287101
77031	Slc9a8	mRNA	0.422787461	5.81E-06
13039	Ctsl	mRNA	0.190445989	0.002154955
76132	Faxc	mRNA	0.599233788	3.98E-12
97998	Deptor	mRNA	-0.805594528	2.09E-15
16004	Igf2r	mRNA	0.341927829	2.78E-05
68201	Ccdc34	mRNA	-0.298503748	9.64E-04
235493	Fam214a	mRNA	0.799050346	9.54E-13
75219	Dusp18	mRNA	-1.279875225	8.89E-46
24058	Sigirr	mRNA	-0.739533848	0.001061227
240041	Zfp945	mRNA	0.360546928	0.001010829
75398	Mrpl32	mRNA	-0.443380586	2.12E-05
320802	Ifitm10	mRNA	-0.801160578	0.016431504
29864	Rnf11	mRNA	-0.208135122	0.005922735
20256	Clec11a	mRNA	-0.682868201	5.01E-09
107869	Cth	mRNA	0.213837957	0.029771994
224088	Atp13a3	mRNA	-0.909526703	3.88E-55
78926	Gas2l1	mRNA	-0.218633005	0.003107798
210544	Tbc1d31	mRNA	0.145367713	0.023166181
230098	Arhgef39	mRNA	0.3505394	0.01527783
71111	Gpr39	mRNA	-0.742467942	0.001060204
100503584	Zfp534	mRNA	0.778189409	4.21E-05
105352	Dusp22	mRNA	-0.445974562	0.017957589
15526	Hspa9	mRNA	-0.534886148	1.09E-36
66870	Serbp1	mRNA	-0.293305443	3.48E-07
50912	Exosc10	mRNA	-0.40863635	8.68E-10
320554	Tcp11l1	mRNA	0.411009949	0.003677316
102635781	Gm38481	mRNA	-0.495944688	0.001124368
11867	Arpc1b	mRNA	-0.260992901	4.39E-06
13346	Des	mRNA	1.173641919	7.23E-15
16451	Jak1	mRNA	-0.670527	4.27E-32
240672	Dusp5	mRNA	-0.66138296	0.02197055
16324	Inhbb	mRNA	-0.226851461	0.003076054
67619	Nob1	mRNA	-0.298916772	0.015889311
18295	Ogn	mRNA	0.151399147	0.043729399
76626	Msi2	mRNA	0.208052256	0.040907424
210992	Lpcat1	mRNA	-0.244780729	0.014979037
319880	Tmcc3	mRNA	0.291475991	0.003882374
228961	Npepl1	mRNA	-0.212330492	0.019640666
12421	Rb1cc1	mRNA	-0.221864431	6.78E-04
69151	Lzic	mRNA	-0.424531429	7.95E-04
214424	Parp16	mRNA	0.602785005	0.004085711
80892	Zfhx4	mRNA	1.024849185	1.28E-18
269003	Sap130	mRNA	-0.499703726	3.34E-10
68178	Cgnl1	mRNA	-0.347054174	5.76E-08
230596	Prpf38a	mRNA	-0.428396086	9.75E-05
18640	Pfkfb2	mRNA	0.306152461	0.016840075
229776	Cdc14a	mRNA	0.395465209	0.043513751
19079	Prkab1	mRNA	-0.391589297	7.53E-07
71446	Wrb	mRNA	-0.325099457	0.027854693
27214	Dbf4	mRNA	-0.272397835	1.67E-07
14972	H2-K1	mRNA	0.61838387	3.23E-04
21401	Tcea3	mRNA	-0.868965235	0.025175049
110821	Pcca	mRNA	0.455066184	1.09E-04
216961	Coro6	mRNA	0.500214025	4.11E-04
12442	Ccnb2	mRNA	-0.347730841	1.24E-06
244853	Nxpe4	mRNA	0.69165714	6.87E-04
17993	Ndufs4	mRNA	-0.353807986	0.001029937
12519	Cd80	mRNA	-1.703381746	5.41E-06
320277	Spef2	mRNA	2.384337577	9.85E-04
70240	Ufsp1	mRNA	-0.669248784	0.034154345
246228	Vwa1	mRNA	0.823046669	0.01437197
211986	Tmem18	mRNA	0.37409726	0.008056632
21681	Alyref	mRNA	-0.361309857	6.80E-08
270906	Prr11	mRNA	-0.284293966	8.35E-06
110175	Ggct	mRNA	-0.91290834	0.044159356
76916	Timmdc1	mRNA	-0.868659179	2.02E-16
66385	Ppp1r7	mRNA	-0.228810523	0.00900904
218850	Fam208a	mRNA	0.538117994	3.85E-06
15353	Hmg20b	mRNA	0.214350147	0.042783508
107527	Il1rl2	mRNA	-4.530370321	0.006556513
72123	Ccdc71l	mRNA	0.400978997	0.019433998
74747	Ddit4	mRNA	0.300835173	0.016026516
26904	Sh2d1b1	mRNA	-1.173491629	9.73E-04
268882	Fbxo45	mRNA	-0.971511789	2.14E-36
244058	Rgma	mRNA	0.440567234	0.001209984
72569	Bbs5	mRNA	-0.407447938	0.035081602
13665	Eif2s1	mRNA	-0.321432548	3.40E-06
66676	Tmed7	mRNA	-0.42929024	1.92E-14
77106	Tmem181a	mRNA	0.200843906	0.016735921
70118	Srrd	mRNA	-0.425351798	0.004269208
50769	Atp8a2	mRNA	1.668165433	0.044705233
12988	Csk	mRNA	-0.267775713	4.37E-04
668173	Pex10	mRNA	-0.86396053	0.001788039
68490	Zfp579	mRNA	0.330440713	0.012757753
226090	Ermp1	mRNA	0.408378981	7.34E-09
66694	Uqcrfs1	mRNA	-0.20857961	0.008291093
14584	Gfpt2	mRNA	-2.333245644	6.10E-22
244871	Zc3h12c	mRNA	0.292931699	0.017546595
16780	Lamb3	mRNA	0.855760489	0.001583659
319670	Eml5	mRNA	0.645655678	3.35E-08
218454	Lhfpl2	mRNA	0.313476008	1.04E-04
217124	Ppp1r9b	mRNA	0.214324899	5.63E-04
20447	St6galnac3	mRNA	1.730127846	0.002220224
17161	Maoa	mRNA	-0.381713558	4.51E-08
70579	Zc3h11a	mRNA	0.25502475	1.21E-04
71481	Alpk1	mRNA	0.415489566	0.00127263
66101	Ppih	mRNA	-0.27751542	0.00802676
208117	Aph1b	mRNA	0.423330706	1.21E-04
382253	Cdkl5	mRNA	0.602044486	0.001564565
22420	Wnt6	mRNA	1.766228172	1.66E-43
214944	Mob3b	mRNA	2.421153013	6.63E-12
225215	Rsl24d1	mRNA	-0.386730632	1.46E-06
66929	Asf1b	mRNA	-0.289381734	9.90E-04
74637	Shpk	mRNA	0.898733338	0.005171739
20682	Sox9	mRNA	-1.02475358	4.48E-08
93893	Pcdhb22	mRNA	0.577725713	0.012411465
93691	Klf7	mRNA	-0.419387602	3.06E-04
69178	Snx5	mRNA	-0.414075788	4.22E-11
105827	Amigo2	mRNA	1.045074169	8.44E-19
282619	Sbsn	mRNA	-1.121516488	1.30E-16
235086	Igsf9b	mRNA	0.460673309	0.009608602
66396	Ccdc82	mRNA	0.300616504	1.75E-04
30944	Zfp354c	mRNA	0.781437162	6.92E-16
13998	Fgd6	mRNA	0.564070784	1.29E-04
74030	Rin2	mRNA	1.00812402	2.51E-62
26404	Map3k12	mRNA	0.32788627	6.01E-06
59001	Pole3	mRNA	-0.353605229	0.001509323
278279	Tmtc2	mRNA	2.757608333	4.03E-36
68026	Pclaf	mRNA	-0.251562777	9.64E-06
54003	Nell2	mRNA	-1.649782559	3.31E-34
81877	Tnxb	mRNA	0.922191581	0.032781565
100170401	EU599041	mRNA	2.68148256	2.28E-04
66441	Magohb	mRNA	-0.545190637	5.01E-05
79565	Mettl27	mRNA	-0.518845227	1.45E-04
18762	Prkcz	mRNA	0.869053239	0.008398143
16601	Klf9	mRNA	-0.359566463	0.010311395
68971	Tamm41	mRNA	-0.350012468	0.009494612
17448	Mdh2	mRNA	-0.238833758	1.82E-05
104383	Rcor2	mRNA	0.506556218	8.52E-06
193742	Abhd16a	mRNA	0.292400782	0.007527844
72787	Ndc1	mRNA	-0.380322281	1.48E-12
109054	Pfdn4	mRNA	-0.294792748	0.046887813
26405	Map3k2	mRNA	-0.374542442	4.21E-05
21648	Dynlt1b	mRNA	0.319819442	0.005540115
15212	Hexb	mRNA	0.281270831	5.48E-04
12615	Cenpa	mRNA	-0.409589142	3.41E-06
230598	Nrd1	mRNA	-0.369106317	4.68E-11
21677	Tead2	mRNA	0.345482363	4.98E-07
74122	Tmem43	mRNA	-0.218320465	0.002273761
60440	Iigp1	mRNA	1.370369314	8.36E-23
64657	Mrps10	mRNA	-0.264588552	0.019860342
66366	Ergic3	mRNA	0.25616373	0.001797326
268490	Lsm12	mRNA	-0.294640487	3.60E-06
27993	Imp4	mRNA	-0.297617416	0.004864141
18951	5-Sep	mRNA	-0.559817395	2.51E-20
68047	Mpnd	mRNA	0.221833428	0.026287742
22228	Ucp2	mRNA	-0.770999149	5.64E-37
328110	Prpf39	mRNA	0.195209673	0.020001011
66315	Senp7	mRNA	0.533128368	6.33E-06
230376	Haus6	mRNA	-0.401240299	1.39E-08
57837	Eral1	mRNA	-0.355473619	0.002043956
20913	Stxbp4	mRNA	0.607581164	1.10E-11
19935	Mrpl23	mRNA	0.524636013	7.98E-05
14248	Flii	mRNA	-0.161551118	0.02360912
230259	E130308A19Rik	mRNA	-0.414484104	0.046937148
18595	Pdgfra	mRNA	-0.961776934	1.45E-07
20524	Slc25a17	mRNA	0.252053127	8.93E-05
227656	Rexo4	mRNA	-0.29936755	0.001250337
74781	Wipi2	mRNA	-0.208441776	0.002186986
22223	Uchl1	mRNA	-0.919131328	4.57E-05
66628	Thg1l	mRNA	-0.486484934	7.53E-05
11789	Apc	mRNA	-0.281255589	3.42E-04
69546	Mapk1ip1	mRNA	0.456471221	0.035423849
66665	Msantd3	mRNA	0.401213272	2.34E-05
209200	Dtx3l	mRNA	-0.226013398	0.005808774
56307	Metap2	mRNA	-0.155207382	0.033905153
68795	Ubr3	mRNA	0.327553765	2.70E-05
50793	Orc3	mRNA	0.349503295	9.60E-07
104080	Nxph4	mRNA	0.751479799	0.010967975
20269	Scn3a	mRNA	1.018932193	8.37E-06
68401	G6pc3	mRNA	-0.395193249	5.32E-04
15159	Hccs	mRNA	-0.257667415	0.002773434
240055	Neurl1b	mRNA	-0.558733809	2.96E-04
106068	Slc45a4	mRNA	-0.22637142	0.00499625
17174	Masp1	mRNA	-1.660917857	1.62E-185
14465	Gata6	mRNA	-0.853407548	0.030455364
64009	Syne1	mRNA	0.649022269	2.80E-04
99151	Cercam	mRNA	0.499547133	1.08E-08
59057	Zfp24	mRNA	-0.192666191	0.046162976
19305	Pex5	mRNA	-0.331692116	4.76E-05
26441	Psma4	mRNA	-0.146353818	0.038638998
67197	Zcrb1	mRNA	-0.1979514	0.023842297
14086	Fscn1	mRNA	-0.329129462	6.37E-09
67949	Nifk	mRNA	-0.306645575	2.82E-05
66997	Psmd12	mRNA	-0.277112058	8.74E-06
30056	Timm9	mRNA	-0.394582134	0.031383934
24061	Smc1a	mRNA	0.168376808	0.001639815
11973	Atp6v1e1	mRNA	0.173420543	0.023109378
381101	Dnph1	mRNA	-0.293131658	0.045426197
11757	Prdx3	mRNA	-0.227069781	0.003988389
20564	Slit3	mRNA	-1.421846021	4.73E-10
29867	Cabp1	mRNA	1.074980822	0.00306773
50492	Thop1	mRNA	-0.260065193	8.13E-04
232087	Mat2a	mRNA	-0.196091531	0.001038424
12177	Bnip3l	mRNA	-0.254535452	8.57E-05
22654	Zfp13	mRNA	-0.475795853	0.04699344
16477	Junb	mRNA	-0.343427457	0.002563149
21826	Thbs2	mRNA	-0.578461073	1.50E-26
225115	Svil	mRNA	0.307019532	9.98E-06
320376	Bcorl1	mRNA	-0.312835243	7.97E-04
240038	Zfp994	mRNA	0.38839848	0.00146372
64136	Sdf2l1	mRNA	-0.553415122	5.82E-05
74670	Zfp943	mRNA	0.313134491	0.036797938
67115	Rpl14	mRNA	-0.221194341	0.01050145
66245	Hspbp1	mRNA	-0.316078744	0.004346795
63958	Ube4b	mRNA	-0.510526342	1.47E-19
70771	Gpr173	mRNA	0.482212	1.66E-05
378435	Mafa	mRNA	2.024486586	5.26E-06
109135	Plekha5	mRNA	-0.309129444	4.71E-04
223774	Alg12	mRNA	0.285579384	0.026655923
264134	Ttc26	mRNA	0.284544753	0.045189812
227525	Dclre1c	mRNA	0.325262838	0.002824814
109242	Kif24	mRNA	0.408047223	0.008971186
71990	Ddx54	mRNA	-0.260262813	7.45E-05
229524	Msto1	mRNA	-0.296061242	0.002248377
75687	Ripor1	mRNA	0.18337116	0.046805992
59053	Hgh1	mRNA	-0.257658804	0.022307028
228998	Arfgap1	mRNA	0.316959235	8.42E-05
64297	Gprc5b	mRNA	0.419893317	8.42E-08
67169	Nradd	mRNA	0.396357637	0.00127263
232798	Leng8	mRNA	0.296826466	1.35E-04
231655	Oasl1	mRNA	-1.454697649	1.56E-12
22695	Zfp36	mRNA	-0.355651568	0.009923033
14673	Gna12	mRNA	-0.356530446	7.94E-06
108655	Foxp1	mRNA	-0.147138717	0.043840226
223658	Mroh1	mRNA	0.26870726	6.22E-05
17187	Max	mRNA	-0.246124072	0.010554583
16779	Lamb2	mRNA	0.237545086	1.14E-04
16520	Kcnj4	mRNA	1.297079866	5.17E-04
69638	Enho	mRNA	1.384142391	2.30E-05
14013	Mecom	mRNA	0.312412261	0.007051468
232187	Smyd5	mRNA	-0.541169717	1.74E-14
27801	Zdhhc8	mRNA	-0.5805419	9.91E-20
665574	Gm7694	mRNA	0.495752052	0.014807592
239667	Dip2b	mRNA	0.18767159	0.04338309
110380	Shroom2	mRNA	-1.671860168	1.93E-04
12331	Cap1	mRNA	-0.552693938	1.29E-22
100986	Akap9	mRNA	0.267320263	0.001508904
208647	Creb3l2	mRNA	0.159620918	0.040015216
56228	Ube2j1	mRNA	0.254453262	6.14E-05
67847	Sncaip	mRNA	-1.446103893	0.001511178
77929	Yipf6	mRNA	0.357236133	4.47E-07
100494	Zfand2a	mRNA	-0.368153178	5.50E-07
327762	Dna2	mRNA	0.356855584	0.034389518
11544	Adprh	mRNA	-0.782835429	5.50E-21
230648	Efcab14	mRNA	-0.334045304	2.27E-05
85305	Kars	mRNA	-0.243370866	4.19E-04
233752	Insc	mRNA	1.199000306	6.74E-17
666173	Vps13b	mRNA	0.351506042	1.49E-04
11774	Ap3b1	mRNA	-0.170699871	0.020750988
102642386	LOC102642386	mRNA	1.404591033	0.029744208
12257	Tspo	mRNA	0.294341655	2.06E-04
217310	Hid1	mRNA	0.527460449	1.08E-04
60595	Actn4	mRNA	-0.238464742	8.08E-07
224617	Tbc1d24	mRNA	0.622493552	1.15E-09
66540	Fam107b	mRNA	-0.287295979	1.51E-05
384281	Gatc	mRNA	-0.265465565	0.010271773
27360	Add3	mRNA	0.295317073	4.66E-05
100271882	Gm14139	mRNA	0.897331291	2.32E-06
214345	Lrrc1	mRNA	0.386371151	0.01050145
78134	Lpar4	mRNA	0.490081089	4.41E-04
13200	Ddost	mRNA	-0.260252284	1.52E-05
223455	6-Mar	mRNA	0.27674449	4.13E-05
73723	Sh3bgrl3	mRNA	-0.486234399	3.82E-07
18557	Cdk18	mRNA	-0.213835088	0.049611481
385377	Pnma5	mRNA	-1.714585623	4.28E-11
22145	Tuba4a	mRNA	-0.75664785	3.24E-10
380959	Alg10b	mRNA	0.156630554	0.042747271
74326	Hnrnpr	mRNA	-0.217034402	3.65E-04
13139	Dgka	mRNA	1.517588101	9.41E-08
214133	Tet2	mRNA	0.954109125	2.57E-17
27632	Nelfe	mRNA	-0.340901277	2.76E-04
68800	Prr32	mRNA	1.095605264	6.10E-09
67838	Dnajb11	mRNA	-1.126670895	1.79E-87
17454	Mov10	mRNA	-0.184098326	0.039313671
26377	Dapp1	mRNA	0.451015669	7.43E-04
56209	Gde1	mRNA	0.204220445	0.008933756
14825	Cxcl1	mRNA	-0.999410087	7.26E-10
16373	Irx3	mRNA	0.449600944	0.038158635
13841	Epha7	mRNA	1.498901387	2.43E-22
170776	Cd209c	mRNA	-0.27016482	0.01936505
21767	Tex264	mRNA	0.251106104	0.00116192
12455	Ccnt1	mRNA	0.287366693	5.54E-04
19155	Npepps	mRNA	-0.164852988	0.011014883
75805	Nln	mRNA	-0.47351517	1.41E-10
17133	Maff	mRNA	-0.709095091	3.08E-06
12785	Cnbp	mRNA	-0.3972168	4.64E-11
170460	Stard5	mRNA	0.758970793	4.30E-14
72759	Tmem135	mRNA	-0.30660744	0.003593796
56282	Mrpl12	mRNA	-0.443381437	2.02E-06
68659	Fam198b	mRNA	-1.37501507	1.63E-37
67973	Mphosph10	mRNA	-0.271176688	0.001301318
69900	Mfsd11	mRNA	0.228422854	0.025613576
24050	3-Sep	mRNA	0.665657486	5.59E-04
29876	Clic4	mRNA	-0.22480823	2.39E-05
242594	Fyb2	mRNA	-1.04752132	1.61E-08
102638847	Gm35315	mRNA	-0.600300698	0.00959534
17295	Met	mRNA	-0.576935346	9.50E-17
14251	Flot1	mRNA	-0.275734045	0.005850807
319944	Taf2	mRNA	0.458963068	1.13E-16
83814	Nedd4l	mRNA	-0.87739881	3.20E-23
235627	Nbeal2	mRNA	0.451738964	0.044512987
22720	Zfp62	mRNA	0.378394126	9.69E-06
26885	Casp8ap2	mRNA	0.578230878	3.29E-13
22402	Wisp1	mRNA	0.666392613	4.80E-36
230654	Lrrc41	mRNA	-0.392460865	2.85E-07
105859	Csdc2	mRNA	0.944829518	1.07E-04
74197	Gtf2e1	mRNA	-0.972342704	1.06E-30
93960	Nkd1	mRNA	2.034804894	1.00E-67
56613	Rps6ka4	mRNA	-0.410000071	2.94E-07
671535	Parp10	mRNA	0.213552837	0.004588057
241915	Phc3	mRNA	0.30568334	0.001605946
76561	Snx7	mRNA	-0.425490794	5.95E-07
83796	Smarcd2	mRNA	0.164506348	0.033308577
14733	Gpc1	mRNA	0.598481058	3.81E-37
57750	Wdr12	mRNA	-0.533286288	4.63E-08
233875	Ino80e	mRNA	-0.198881368	0.04282019
69719	Cad	mRNA	-0.557116187	2.14E-16
668158	Ccdc85c	mRNA	-0.335482991	0.004754228
20289	Scx	mRNA	0.938565093	1.72E-36
70238	Rnf168	mRNA	-0.875314533	3.64E-39
54484	Mkrn1	mRNA	0.305645424	0.006610498
217351	Tnrc6c	mRNA	0.420832561	8.40E-09
68480	Card19	mRNA	-0.243798846	0.047476722
13016	Ctbp1	mRNA	-0.269863338	8.43E-05
21416	Tcf7l2	mRNA	-0.530240638	1.23E-06
52468	Ctdsp2	mRNA	0.202238741	5.89E-04
504193	Npcd	mRNA	0.42656373	2.16E-11
223254	Farp1	mRNA	0.306890372	1.25E-05
113868	Acaa1a	mRNA	0.397979435	0.001832935
71801	Plekhf2	mRNA	0.471438815	0.001063508
21825	Thbs1	mRNA	-1.113600151	3.96E-80
117599	Helb	mRNA	0.362012321	6.08E-04
12895	Cpt1b	mRNA	0.738028833	6.42E-06
217149	Cisd3	mRNA	-0.432339431	0.012897261
109264	Me3	mRNA	-0.925522525	1.26E-07
18797	Plcb3	mRNA	-0.187335333	0.031268002
224796	Clic5	mRNA	1.590334693	3.68E-17
53902	Rcan3	mRNA	-0.360064597	1.26E-04
13549	Dyrk1b	mRNA	0.424591621	1.85E-06
553127	Rtl8b	mRNA	0.358636623	7.38E-05
66889	Rnf128	mRNA	0.331878462	0.046132477
56431	Dstn	mRNA	-0.162142624	0.007380263
109181	Trip11	mRNA	0.338405914	4.99E-05
214791	Sertad4	mRNA	0.490805134	1.10E-16
72050	Kdelc1	mRNA	-0.25535475	0.008097543
19878	Rock2	mRNA	-0.149374209	0.030030013
320840	Negr1	mRNA	1.412770099	2.94E-10
97159	A430005L14Rik	mRNA	-0.708198389	2.21E-07
66111	Tmed3	mRNA	0.279622725	0.001191796
70223	Nars	mRNA	-0.327193049	9.93E-11
20747	Spop	mRNA	-0.374917655	5.75E-10
89867	Sec16b	mRNA	0.857117375	1.38E-13
18750	Prkca	mRNA	-0.336294449	6.04E-07
110960	Tars	mRNA	0.145920058	0.005335304
68481	Mpzl1	mRNA	0.318298518	7.73E-05
70237	Bhlhb9	mRNA	0.935442771	1.54E-34
67893	Tmem86a	mRNA	0.819053455	1.59E-12
17909	Myo10	mRNA	0.239016123	8.02E-04
233733	Galnt18	mRNA	1.914153703	0.001682788
11666	Abcd1	mRNA	0.553033719	2.24E-11
208366	Rpp40	mRNA	-1.034754251	4.58E-06
20425	Shmt1	mRNA	-0.486765672	7.25E-07
67390	Mrm3	mRNA	-0.4090476	0.01468293
242316	Gdf6	mRNA	1.137854644	0.002604246
269033	4930503L19Rik	mRNA	-0.360752121	3.21E-04
70556	Slc25a33	mRNA	-0.791342857	1.97E-09
14433	Gapdh	mRNA	-0.340192107	6.52E-10
103268	Cep57l1	mRNA	-0.259426665	0.047880467
12370	Casp8	mRNA	0.345279733	1.56E-05
233905	Zfp646	mRNA	0.299085123	1.64E-04
100502846	Gm19410	mRNA	-5.096516477	0.003951158
16560	Kif1a	mRNA	-4.946258385	1.59E-39
243659	Styk1	mRNA	-1.727894685	2.58E-15
107976	Babam2	mRNA	-0.35869091	5.03E-06
246707	Emilin2	mRNA	-1.630028805	0.0034089
98402	Sh3bp4	mRNA	0.209885795	0.004575073
52513	Ddx56	mRNA	-0.372712212	5.84E-07
320563	Islr2	mRNA	1.925949737	0.012314029
18125	Nos1	mRNA	0.982785102	1.86E-42
268977	Ltbp1	mRNA	-0.36246954	2.19E-11
11908	Atf1	mRNA	-0.210448518	0.001043099
14677	Gnai1	mRNA	0.513928956	8.86E-13
94092	Trim16	mRNA	0.378558693	4.79E-07
16404	Itga7	mRNA	1.013174445	0.015730096
16728	L1cam	mRNA	1.30007616	0.042500199
219135	Mtmr6	mRNA	0.320565942	6.77E-05
18807	Pld3	mRNA	0.375716267	9.69E-06
667281	H60b	mRNA	0.199384062	0.045073835
59002	Wrap73	mRNA	-0.449580418	0.010059864
68215	Fam98b	mRNA	-0.191034465	0.013055489
320207	Pik3r5	mRNA	-1.561865317	8.55E-22
71449	Mettl13	mRNA	-0.318402021	0.016177798
20893	Bhlhe40	mRNA	0.500233158	1.43E-16
20689	Sall3	mRNA	4.538893561	1.79E-08
67037	Pmf1	mRNA	-0.403873789	1.93E-04
214063	Dnajc16	mRNA	-0.38891112	0.004537896
74035	Nol9	mRNA	-0.716309471	3.32E-18
18984	Por	mRNA	-0.369040234	1.05E-08
243725	Ppp1r9a	mRNA	2.630842609	2.48E-09
106143	Cggbp1	mRNA	-0.312119587	2.94E-09
98758	Hnrnpf	mRNA	-0.257826918	3.12E-07
59007	Ngly1	mRNA	0.475818186	0.003336197
17248	Mdm4	mRNA	0.461858392	1.50E-10
70699	Nup205	mRNA	-0.182142578	0.006580407
78304	Naa38	mRNA	-0.447495523	0.001177216
231872	Aimp2	mRNA	-0.423639957	2.29E-07
74237	Tubgcp2	mRNA	0.206554518	0.004467759
66625	Pnisr	mRNA	0.755066424	6.53E-37
22042	Tfrc	mRNA	-1.053292739	1.38E-65
20624	Eftud2	mRNA	-0.296145194	3.42E-08
271127	Adamts16	mRNA	2.833259276	4.24E-38
23897	Hax1	mRNA	0.269731999	3.51E-04
192185	Nadk	mRNA	-0.543105359	1.29E-18
20174	Ruvbl2	mRNA	-0.451775576	8.35E-11
71592	Pogk	mRNA	0.65091764	5.13E-19
56449	Ybx3	mRNA	-0.506274007	9.40E-19
67991	Nacc2	mRNA	0.238252962	0.004200525
268880	Xxylt1	mRNA	-1.095103053	9.44E-47
217946	Cdca7l	mRNA	-0.63275527	5.39E-11
69863	Ttc39b	mRNA	-0.269241986	0.003144804
12539	Cdc37	mRNA	-0.170677456	0.015080765
331623	Bend3	mRNA	-0.355600711	4.45E-04
67046	Tbc1d7	mRNA	-0.395782089	0.02497003
217198	Plekhh3	mRNA	0.30015194	0.015956474
14218	Sh3pxd2a	mRNA	0.362145648	7.63E-07
68040	Zfp593	mRNA	-0.709250067	2.91E-05
235380	Dmxl2	mRNA	0.332127815	0.008366565
103213	Traf3ip2	mRNA	0.367670264	0.020203354
99887	Tmem56	mRNA	2.366211407	9.72E-30
59024	Med12	mRNA	0.247305405	0.004091287
215690	Nav1	mRNA	0.501558405	1.63E-07
213988	Tnrc6b	mRNA	0.281890945	0.003638579
68867	Rnf122	mRNA	0.338912944	0.038158635
71957	Ints11	mRNA	-0.521839329	1.04E-07
58810	Akr1a1	mRNA	-0.193117713	0.003329085
384009	Glipr2	mRNA	0.877742927	1.57E-33
73469	Rnf38	mRNA	0.922671402	2.29E-29
223666	Arhgap39	mRNA	0.261740867	0.007599241
110796	Tshz1	mRNA	-0.608846117	7.89E-07
100042776	Gm4027	mRNA	-3.320878286	0.011063811
235611	Plxnb1	mRNA	0.937545978	9.77E-23
236266	Alms1	mRNA	0.215027978	0.022382436
66743	Rnf220	mRNA	-0.613557972	9.84E-15
18100	Mrpl40	mRNA	-0.685418868	7.37E-16
72634	Tdrkh	mRNA	-0.905807619	7.65E-04
434865	Luzp4	mRNA	4.553347627	0.006336954
101685	Spty2d1	mRNA	0.215500452	0.007051468
27998	Exosc5	mRNA	-0.332390376	0.021314465
16009	Igfbp3	mRNA	-2.047174417	3.43E-04
66454	Nmnat1	mRNA	-0.721865566	0.002448537
20440	St6gal1	mRNA	-0.786572659	3.10E-06
24015	Abce1	mRNA	-0.267327273	3.05E-06
71997	Smg9	mRNA	-0.330912997	0.021059444
18628	Per3	mRNA	-0.338983722	0.046442684
68758	Abhd11	mRNA	-0.472515363	2.35E-04
74104	Abcb6	mRNA	0.290303765	0.019572022
114642	Brdt	mRNA	0.355897099	0.041027455
56447	Copz1	mRNA	0.147315943	0.008159299
56484	Foxo3	mRNA	0.505483534	4.88E-12
20441	St3gal3	mRNA	-0.377786174	0.006242053
16341	Eif3e	mRNA	-0.179932491	9.99E-04
66841	Etfdh	mRNA	0.214842608	0.012226495
12778	Ackr3	mRNA	-0.662802118	4.52E-10
66420	Polr2e	mRNA	-0.618317572	2.23E-08
240034	Zfp760	mRNA	0.492635962	4.66E-04
68151	Wls	mRNA	0.79172129	4.88E-57
268515	Bahcc1	mRNA	-0.500029298	1.22E-07
17182	Matn3	mRNA	-2.053245083	3.56E-04
66860	Tanc1	mRNA	0.461774395	2.80E-12
68910	Zfp467	mRNA	0.955113855	5.51E-06
105239	Rnf44	mRNA	-0.370911822	1.38E-06
12929	Crkl	mRNA	-0.496259633	1.43E-14
21429	Ubtf	mRNA	-0.257897227	5.28E-05
19212	Pter	mRNA	-0.313093378	0.004439137
18763	Pkd1	mRNA	0.6314099	4.37E-15
110173	Manba	mRNA	0.263665599	0.003621943
28193	Reep3	mRNA	0.293532969	2.13E-05
20359	Sema6b	mRNA	-0.817693659	0.04762102
67111	Naaa	mRNA	-0.278845021	2.33E-04
12846	Comt	mRNA	-0.528830755	1.41E-15
630836	2010315B03Rik	mRNA	0.449527995	0.006118108
21770	Ppp2r5d	mRNA	-0.164652531	0.006628659
100043272	Inafm2	mRNA	-0.262728167	0.029299342
236920	Stard8	mRNA	1.854959678	0.001576512
66892	Eif4e3	mRNA	0.56260287	0.002413
83669	Wdr6	mRNA	0.340560535	1.22E-09
20315	Cxcl12	mRNA	-1.669768677	2.54E-221
234825	Klhdc4	mRNA	-0.277430364	0.039795174
269966	Nup98	mRNA	-0.196207968	0.015984844
12282	Hyou1	mRNA	-0.128446853	0.036208726
665270	Plb1	mRNA	1.587503036	4.65E-80
69938	Scrn1	mRNA	0.381087178	2.62E-08
64143	Ralb	mRNA	-0.184813119	0.033308051
238328	Vash1	mRNA	0.671493743	9.83E-06
97487	Cmtm4	mRNA	-0.198383854	0.005033471
268970	Arhgap28	mRNA	0.366235396	1.75E-08
105244208	LOC105244208	pseudo	-0.510116847	1.01E-13
57808	Rpl35a	mRNA	-1.229387894	2.64E-66
56410	Cbln3	mRNA	1.716073135	0.001709426
226139	Cox15	mRNA	-0.215075946	0.01262733
214812	Zfp609	mRNA	0.244888994	0.006561323
69870	Polr3gl	mRNA	0.429715459	2.23E-04
18176	Nras	mRNA	-0.25496639	4.65E-05
72170	Chchd4	mRNA	-0.467834693	6.34E-04
269514	Fbxl4	mRNA	0.606916003	2.02E-05
235431	Coro2b	mRNA	0.34859147	7.35E-05
319876	Cobll1	mRNA	-0.56790362	1.88E-09
15039	H2-T22	mRNA	0.504666783	4.15E-11
50911	Exosc9	mRNA	-0.290194401	0.012970597
78339	Ttyh3	mRNA	0.155397839	0.028341769
19376	Rab34	mRNA	-0.237428087	0.002208723
215789	Phactr2	mRNA	0.731438102	3.50E-13
20716	Serpina3n	mRNA	0.873254187	2.01E-04
269831	Tspan12	mRNA	0.951255638	4.02E-04
68556	Uckl1	mRNA	0.365067048	0.045426197
15944	Irgm1	mRNA	0.317641199	3.91E-06
20768	Sephs2	mRNA	-0.346831346	0.003436203
108767	Pnrc1	mRNA	0.451654314	7.42E-08
74782	Glt8d2	mRNA	-0.468546568	0.01064516
15502	Dnaja1	mRNA	0.243221696	5.36E-06
71911	Bdh1	mRNA	-2.733526868	0.002716697
22154	Tubb5	mRNA	-0.230516516	6.05E-06
57913	Pidd1	mRNA	0.492721365	0.003020745
18767	Pkia	mRNA	-0.719890567	1.12E-09
59287	Ncstn	mRNA	0.250331332	3.77E-04
320118	Fbxl13	mRNA	1.489207316	8.91E-05
71841	Tcp11x2	mRNA	2.627764537	7.73E-57
230784	Sesn2	mRNA	0.396956231	3.64E-05
212531	Sh3bgrl2	mRNA	0.240005546	0.041885486
14735	Gpc4	mRNA	-0.167500344	0.030160208
26896	Med14	mRNA	0.192676291	0.012220115
233865	D430042O09Rik	mRNA	0.352481791	0.008573978
56350	Arl3	mRNA	0.330225263	4.25E-04
68792	Srpx2	mRNA	-1.736643653	6.03E-06
76614	Immt	mRNA	-0.180160718	5.80E-04
68097	Dynll2	mRNA	-0.182469358	0.020787473
52700	Txndc17	mRNA	-0.225758597	0.021168351
77300	Raph1	mRNA	0.722361074	5.22E-21
20308	Ccl9	mRNA	-1.675882832	2.32E-14
16885	Limk1	mRNA	-0.390546799	3.44E-05
106298	Rrn3	mRNA	-0.221461394	1.91E-04
67313	Inava	mRNA	1.280815182	8.52E-21
20475	Six5	mRNA	0.352647992	0.009857544
11799	Birc5	mRNA	-0.52390981	1.20E-13
68592	Syf2	mRNA	-0.330743146	0.003548775
16529	Kcnk5	mRNA	-0.813680953	8.91E-04
223693	Tmem184b	mRNA	0.185438884	0.001815623
69716	Trip13	mRNA	-0.517585993	5.73E-09
110454	Ly6a	mRNA	0.522781973	5.91E-16
11416	Slc33a1	mRNA	0.426819977	2.70E-06
320299	Iqcb1	mRNA	-0.758494536	2.84E-25
11600	Angpt1	mRNA	-0.808266758	1.24E-06
69608	Sec24d	mRNA	0.37374576	2.06E-12
382014	Ano8	mRNA	0.568144899	2.20E-05
320472	Ppm1e	mRNA	0.517691094	1.34E-04
622699	Gm12569	mRNA	-3.660747601	0.003096368
64945	Cldn12	mRNA	-0.486216514	2.79E-14
230770	Tmem39b	mRNA	-0.599469246	5.61E-04
15464	Hrc	mRNA	2.946670834	0.001732472
18805	Pld1	mRNA	0.507152005	6.50E-04
12892	Cpox	mRNA	-0.167190161	0.01680726
23821	Bace1	mRNA	0.40759659	5.44E-08
52466	Slc46a1	mRNA	0.921031502	1.41E-04
11792	Apex1	mRNA	-0.471340693	9.84E-09
14026	Evl	mRNA	0.269521032	0.003930921
216456	Gls2	mRNA	0.969140229	0.00769251
21355	Tap2	mRNA	-0.741388611	8.12E-08
18166	Npy1r	mRNA	-3.957560865	6.06E-04
71843	R3hcc1	mRNA	0.415557809	8.14E-05
53890	Sart3	mRNA	-0.195251523	0.010000351
70083	Metrn	mRNA	0.455266927	2.48E-05
20591	Kdm5c	mRNA	0.208132025	0.003197593
108013	Celf4	mRNA	-0.709086625	1.19E-07
68404	Nrn1	mRNA	-1.148828962	7.51E-14
269951	Idh2	mRNA	0.153795914	0.032827821
18419	Otog	mRNA	2.480463435	1.23E-21
230721	Pabpc4	mRNA	-0.575773575	1.29E-21
18049	Ngf	mRNA	0.583882988	8.05E-05
231148	Ablim2	mRNA	1.337632641	0.034750122
26446	Psmb3	mRNA	-0.283269984	3.49E-05
94284	Ugt1a6a	mRNA	0.295944019	0.025043467
107732	Mrpl10	mRNA	-0.244655784	0.004036262
233802	Thumpd1	mRNA	-0.275243822	4.93E-04
229003	Helz2	mRNA	-1.200042547	8.09E-22
224092	Lsg1	mRNA	-1.032771479	7.98E-69
56220	Zfp386	mRNA	0.446109964	6.40E-06
13806	Eno1	mRNA	-0.647169727	1.15E-26
12022	Barx1	mRNA	0.600492221	0.008754398
56348	Hsd17b12	mRNA	-0.166217351	0.022126464
100039795	Ildr2	mRNA	1.444871046	1.46E-32
78908	Igsf3	mRNA	0.280386761	0.004316273
15251	Hif1a	mRNA	0.164620758	0.015476198
19821	Rnf2	mRNA	0.197220397	0.03098934
51793	Ddah2	mRNA	0.342705313	4.61E-04
16439	Itpr2	mRNA	0.847780969	1.68E-10
15288	Hmbs	mRNA	-0.24770761	0.016480775
269180	Inpp4a	mRNA	0.289944741	0.028351715
14457	Gas7	mRNA	-1.496771966	0.032411237
17304	Mfge8	mRNA	0.278909889	1.62E-07
545554	Ankrd34a	mRNA	1.113002738	3.70E-06
68817	Ddi2	mRNA	-0.300637095	0.006707178
70350	Basp1	mRNA	0.365668524	7.55E-09
16367	Irs1	mRNA	1.455320255	5.94E-127
22070	Tpt1	mRNA	0.337532637	3.98E-08
233071	Arhgap33	mRNA	0.21827737	0.031626609
22275	Urod	mRNA	-0.287813201	0.045423844
12038	Bche	mRNA	1.883661708	1.99E-06
108934	Smim13	mRNA	-0.304842932	0.007402231
12445	Ccnd3	mRNA	-0.23369642	0.001285437
14670	Gnl1	mRNA	-0.340984351	1.74E-06
225791	Zadh2	mRNA	-0.82537107	6.02E-11
19255	Ptpn2	mRNA	-0.562331601	5.64E-14
66233	Dmap1	mRNA	-0.465186911	0.001626585
223870	Senp1	mRNA	0.153739959	0.036646656
15228	Foxg1	mRNA	2.28291134	0.002168399
18132	Notch4	mRNA	-1.408262505	3.81E-10
13845	Ephb3	mRNA	-0.859271785	3.59E-29
13481	Dpm2	mRNA	-0.30221166	0.011163352
212483	Fam193b	mRNA	0.354838366	7.62E-04
70031	Cmtm8	mRNA	-5.603178558	4.99E-04
15903	Id3	mRNA	-1.965935958	2.44E-73
108841	Rdh13	mRNA	-0.614475515	5.52E-08
235315	Rnf214	mRNA	0.220445267	0.012206938
216440	Os9	mRNA	0.392094772	1.32E-10
234214	Sorbs2	mRNA	-2.331375657	6.94E-58
22724	Zbtb7b	mRNA	0.195383744	0.036615549
64540	Tspan4	mRNA	-0.501578406	5.99E-14
208092	Chmp6	mRNA	-0.444281284	3.83E-05
18746	Pkm	mRNA	-0.15748338	9.47E-04
12827	Col4a2	mRNA	0.804357129	1.21E-22
102954	Nudt10	mRNA	1.297338085	0.017407298
72354	Ttc4	mRNA	-0.229411075	0.032964826
74167	Nudt9	mRNA	-0.587068716	2.73E-12
434729	Fthl17f	mRNA	4.561118425	0.023123197
329934	Foxo6	mRNA	2.02099809	5.55E-14
232943	Klc3	mRNA	0.536778461	0.00129162
668880	Stard9	mRNA	0.6035113	1.06E-06
13885	Esd	mRNA	-0.472379128	8.70E-11
74778	Rrp7a	mRNA	-0.340008597	1.63E-09
56427	Tubd1	mRNA	-0.71979719	3.30E-05
19054	Ppp2r3d	mRNA	1.30032532	8.89E-05
98682	Mfsd6	mRNA	0.349164679	0.002466626
56213	Htra1	mRNA	0.339256943	9.19E-14
17977	Ncoa1	mRNA	0.419974346	1.77E-04
18032	Nfix	mRNA	0.182461522	0.003513596
81003	Trim23	mRNA	-0.24658348	0.028118659
68526	Gpr155	mRNA	0.959294823	3.51E-08
66375	Dhrs7	mRNA	0.702464353	2.98E-08
100503353	Gm14440	mRNA	0.244048626	0.008979502
66592	Stoml2	mRNA	0.328823531	3.55E-05
100515	Zfp518b	mRNA	0.222089683	0.012397767
16419	Itgb5	mRNA	-0.729589709	5.91E-56
225745	Haus1	mRNA	-0.528931362	2.45E-06
66330	1700020L24Rik	mRNA	1.202346302	0.001331241
72278	Ccpg1	mRNA	0.345941086	1.13E-05
71323	Rassf8	mRNA	0.308017015	0.001082313
65973	Asph	mRNA	0.1817332	0.018839646
83383	Tfap4	mRNA	-0.756403505	5.94E-07
16173	Il18	mRNA	0.726052094	1.44E-19
236643	Sytl5	mRNA	-0.367585909	0.044614425
320685	Dctd	mRNA	-0.589182552	5.20E-05
239546	Zfp647	mRNA	0.477033799	8.62E-04
12837	Col8a1	mRNA	-0.661243983	1.41E-22
320508	Cachd1	mRNA	-0.533686603	9.51E-05
12834	Col6a2	mRNA	0.223109158	8.57E-04
20304	Ccl5	mRNA	-0.813071894	7.12E-06
12537	Cdk11b	mRNA	-0.357657755	1.10E-05
67025	Rpl11	mRNA	-0.584699148	5.17E-04
21422	Tfcp2	mRNA	0.431288595	8.95E-07
223527	Eny2	mRNA	0.323923103	2.21E-06
13813	Eomes	mRNA	-3.707881743	5.00E-06
216963	Git1	mRNA	-0.269337774	1.64E-05
237175	Adgrg2	mRNA	-8.625232915	1.11E-11
17425	Foxk1	mRNA	-0.186634579	0.039739408
192173	Mcrip1	mRNA	0.291531199	0.001918066
319817	Rc3h2	mRNA	0.288898997	0.004916376
270163	Myo9a	mRNA	0.190306251	0.028095183
666060	Frmpd1	mRNA	2.048106499	8.09E-11
233406	Prc1	mRNA	-0.216889575	6.70E-05
319322	Sf3b2	mRNA	-0.157397796	0.003979338
18220	Nucb1	mRNA	0.347935622	2.70E-11
19262	Ptpra	mRNA	0.161072005	0.01598783
386463	Cdsn	mRNA	0.574252016	1.15E-29
11772	Ap2a2	mRNA	-0.243359813	1.51E-05
83797	Smarcd1	mRNA	-0.164922954	0.015921327
217109	Utp18	mRNA	-0.415489561	3.01E-08
17913	Myo1c	mRNA	-0.248084121	2.73E-06
114679	Selenom	mRNA	0.300147769	0.003078521
22346	Vhl	mRNA	0.205512742	0.04132216
80289	Lysmd3	mRNA	0.29826269	0.008415083
18150	Npm3	mRNA	-0.348052138	3.29E-04
76709	Arpc2	mRNA	-0.222679502	6.41E-04
269423	Abhd18	mRNA	1.206865947	1.27E-04
30939	Pttg1	mRNA	-0.41949949	5.70E-04
69470	Tmem127	mRNA	0.222335501	0.002829731
70335	Reep6	mRNA	0.404063758	1.58E-05
29869	Ulk2	mRNA	0.184655697	0.026286251
234664	Nae1	mRNA	-0.238862409	0.021906562
242109	Zfp697	mRNA	0.550965982	0.004398163
18718	Pip4k2a	mRNA	-0.301512512	0.034803517
68015	Trap1	mRNA	-0.182370748	0.008060017
19672	Rcn1	mRNA	0.198297069	4.08E-04
99003	Qser1	mRNA	0.224544277	0.009285154
69276	Sec62	mRNA	0.17742487	0.012220115
56347	Eif3c	mRNA	0.122841963	0.015444077
66667	Hspbap1	mRNA	-1.086492882	5.26E-18
240121	Fsd1	mRNA	-0.994525276	0.004809979
68276	Toe1	mRNA	-0.498490311	1.28E-05
14570	Arhgdig	mRNA	-2.947732622	7.61E-08
26382	Fgd2	mRNA	1.633502909	0.044144906
80752	Fam20c	mRNA	-1.977085864	1.39E-40
12466	Cct6a	mRNA	-0.32408879	4.16E-10
19276	Ptprn2	mRNA	-1.778941916	0.027530098
236792	Mmgt1	mRNA	0.132689999	0.046772315
16348	Invs	mRNA	0.879646453	2.78E-16
226041	Pgm5	mRNA	1.808267152	2.56E-286
245474	Dkc1	mRNA	-0.36910494	9.20E-09
56044	Rala	mRNA	-0.2775294	7.54E-04
230866	Emc1	mRNA	-0.401343621	1.32E-06
104444	Rexo2	mRNA	-0.542551622	1.93E-10
14595	B4galt1	mRNA	0.492932253	1.19E-14
17216	Mcm2	mRNA	0.165050984	0.002338185
258783	Olfr920	mRNA	1.142536676	0.040569642
242122	Vtcn1	mRNA	1.309318636	5.75E-05
26395	Map2k1	mRNA	-0.205054598	0.006979946
69305	Dcps	mRNA	-0.37848135	6.66E-04
17067	Ly6c1	mRNA	1.073330171	5.10E-79
213498	Arhgef11	mRNA	0.354137005	3.29E-06
67027	Mkrn2	mRNA	-0.254455559	0.020157487
338348	Ttc16	mRNA	2.916187312	0.01390585
23970	Pacsin2	mRNA	-0.257337457	4.95E-07
18105	Nqo2	mRNA	-0.257218908	0.031488403
18799	Plcd1	mRNA	0.456674985	1.88E-05
217410	Trib2	mRNA	-1.279573814	0.002038013
19384	Ran	mRNA	-0.47246673	5.01E-19
100608	Noc4l	mRNA	-0.548110006	5.12E-12
18719	Pip5k1b	mRNA	1.010788955	0.00195075
218490	Btf3	mRNA	-0.326663228	1.27E-06
13122	Cyp7a1	mRNA	1.981206039	0.029862948
[truncated: 3,093 more rows]
