# Supplementary material for: Fam20c regulates the calpain proteolysis system through phosphorylating Calpasatatin to maintain cell homeostasis
Source: J Transl Med. 2023 Jun 27;21:417. doi: 10.1186/s12967-023-04275-4 (PMC10294482; doi:10.1186/s12967-023-04275-4)
Supplement: Supplementary file 11 — Additional file 11. Table S5 109 overlapped down-regulated differentially expressed genes between ATAC-seq and RNA-seq. [file 12967_2023_4275_MOESM11_ESM.xlsx]

## Sheet: Sheet1
Table. S4 127 overlapped up-regulated differentially expressed genes between ATAC-seq and RNA-seq.
6430548M08Rik
Ablim2
Adam22
Adamtsl2
Adgra1
Adgrl3
Ankrd1
Ankrd6
Apba1
Arl11
Aspg
Bcar3
Bend4
Cacna1g
Cadps
Cdc42ep5
Cdh18
Chn2
Clic5
Cnpy1
Cntfr
Col22a1
Col3a1
Cttnbp2
Cyb5r2
D6Ertd527e
Daam2
Dgka
Dock10
Dpep1
Eepd1
Efnb1
Epha7
Eppk1
EU599041
F11r
Fabp3
Fam167a
Fam189a1
Fbxl7
Fgd2
Fgf21
Foxg1
Foxo6
Frmpd1
Fry
Fut9
Gabrb3
Gatm
Gbp8
Gimap9
Gm13212
Gm41349
Gprc5c
Hmcn1
Igfbp2
Igfbp5
Ildr2
Insc
Itga7
Itgbl1
Jph1
Kcnb1
Klhl13
Klhl30
Klhl32
Lama1
Lingo2
Lrrc17
Lrrc32
Ly6c1
Mamdc2
Map2
Map7d2
Mmp16
Mob3b
Mtus2
Mybph
Myom2
Nalcn
Nap1l2
Ndn
Nebl
Nid2
Nkx6-1
Nt5e
Nudt10
Nxf3
Nxf7
Olfml3
Osr2
Otog
P2ry14
Pced1b
Plb1
Plekhg1
Pnliprp2
Pou4f1
Ppfia4
Prex1
Prickle1
Prr32
Rin2
Scml2
Scn3a
Scn5a
Scn7a
Selenbp1
Sema6a
Serpinb11
Serpinb7
Sned1
Spef2
Sspo
St3gal1
Stap2
Stk32b
Sybu
Taf7l
Tmem252
Tmem88b
Tph2
Wasf3
Wif1
Xpnpep2
Zfp618
Zfp936
